# Supplementary material for: Impact of genetic testing on low-density lipoprotein cholesterol in patients with familial hypercholesterolemia (GenTLe-FH): a randomised waiting list controlled open-label study protocol
Source: PubMed Central journal article supplement — BMJ Open. 2018 Dec 28;8(12):e023636. doi: 10.1136/bmjopen-2018-023636 (PMC6318585; doi:10.1136/bmjopen-2018-023636), 2018-12-28
Supplement: bmjopen-2018-023636.draft_revisions.pdf [file bmjopen-2018-023636.draft_revisions.pdf]

# BMJ Open

BMJ Open is committed to open peer review. As part of this commitment we make the peer review history of every article we publish publicly available.

When an article is published we post the peer reviewers' comments and the authors' responses online. We also post the versions of the paper that were used during peer review. These are the versions that the peer review comments apply to.

The versions of the paper that follow are the versions that were submitted during the peer review process. They are not the versions of record or the final published versions. They should not be cited or distributed as the published version of this manuscript.

BMJ Open is an open access journal and the full, final, typeset and author-corrected version of record of the manuscript is available on our site with no access controls, subscription charges or pay-per-view fees (<http://bmjopen.bmj.com>).

If you have any questions on BMJ Open's open peer review process please email [info.bmjopen@bmj.com](mailto:info.bmjopen@bmj.com)

# BMJ Open

## Impact of Genetic Testing on Low-density Lipoprotein Cholesterol in Patients with Familial Hypercholesterolemia (GenTLe-FH): Study Protocol

|                               |                                                                                                                                                                                                                                                                                                                                                                                                                                                                                                                                                                                                                                                                                                                                                                                                                 |
|-------------------------------|-----------------------------------------------------------------------------------------------------------------------------------------------------------------------------------------------------------------------------------------------------------------------------------------------------------------------------------------------------------------------------------------------------------------------------------------------------------------------------------------------------------------------------------------------------------------------------------------------------------------------------------------------------------------------------------------------------------------------------------------------------------------------------------------------------------------|
| Journal:                      | <i>BMJ Open</i>                                                                                                                                                                                                                                                                                                                                                                                                                                                                                                                                                                                                                                                                                                                                                                                                 |
| Manuscript ID                 | bmjopen-2018-023636                                                                                                                                                                                                                                                                                                                                                                                                                                                                                                                                                                                                                                                                                                                                                                                             |
| Article Type:                 | Protocol                                                                                                                                                                                                                                                                                                                                                                                                                                                                                                                                                                                                                                                                                                                                                                                                        |
| Date Submitted by the Author: | 18-Apr-2018                                                                                                                                                                                                                                                                                                                                                                                                                                                                                                                                                                                                                                                                                                                                                                                                     |
| Complete List of Authors:     | Nomura, Akihiro; Kanazawa University Graduate School of Medicine, Department of Cardiovascular and Internal Medicine<br>Tada, Hayato; Kanazawa University Graduate School of Medicine, Department of Cardiovascular and Internal Medicine<br>Okada, Hirofumi; Kanazawa University Graduate School of Medicine, Department of Cardiovascular and Internal Medicine<br>Nohara, Atsushi; Kanazawa University Graduate School of Medical Sciences, Medical Education Research Center<br>Ishikawa, Hideki; Kyoto Prefectural University of Medicine, Department of Molecular-Targeting Cancer Prevention<br>Yoshimura, Kenichi; Kanazawa University, Innovative Clinical Research Center<br>Kawashiri, Masa-aki; Kanazawa University Graduate School of Medicine, Department of Cardiovascular and Internal Medicine |
| Keywords:                     | Familial hypercholesterolemia, genetic testing, genetic counseling, cardiovascular risk                                                                                                                                                                                                                                                                                                                                                                                                                                                                                                                                                                                                                                                                                                                         |
|                               |                                                                                                                                                                                                                                                                                                                                                                                                                                                                                                                                                                                                                                                                                                                                                                                                                 |

SCHOLARONE™  
Manuscripts

1  
2  
3 1 **Impact of Genetic Testing on Low-density Lipoprotein Cholesterol in**  
4 2 **Patients with Familial Hypercholesterolemia (GenTLe-FH): Study Protocol**  
5 3  
6  
7 4  
8  
9

10 5 Akihiro Nomura<sup>1,2</sup>, Hayato Tada<sup>1</sup>, Hirofumi Okada<sup>1</sup>, Atsushi Nohara<sup>1</sup>, Hideki Ishikawa<sup>3</sup>,  
11 6 Ken-ichi Yoshimura<sup>2</sup>, Masa-aki Kawashiri<sup>1</sup>  
12  
13 7

14  
15 8 <sup>1</sup> Department of Cardiovascular and Internal Medicine, Kanazawa University Graduate  
16 9 School of Medicine, Japan

17  
18 10 <sup>2</sup> Innovative Clinical Research Center, Kanazawa University (iCREK), Japan

19  
20 11 <sup>3</sup> Department of Molecular-Targeting Cancer Prevention, Kyoto Prefectural University of  
21 12 Medicine, Japan  
22  
23 13  
24  
25 14  
26  
27 15

28  
29  
30 16 **Corresponding author:** Hayato Tada, MD, PhD  
31 17 Department of Cardiovascular and Internal Medicine  
32 18 Kanazawa University Graduate School of Medicine  
33 19 13-1 Takara-machi, Kanazawa, Ishikawa, 920-8641 Japan  
34 20 Phone number: +81-76-265-2259  
35 21 E-mail: ht240z@sa3.so-net.ne.jp  
36  
37  
38  
39 22  
40  
41 23  
42  
43 24 **Word count:** 3797 words  
44  
45  
46 25  
47  
48  
49  
50  
51  
52  
53  
54  
55  
56  
57  
58  
59  
60

## 1 ABSTRACT

2 **Introduction:** Familial hypercholesterolemia (FH) is an autosomal dominant inherited  
3 genetic disease. High-throughput sequencing quickly and comprehensively detects causative  
4 variants of FH-related genes (*LDLR*, *PCSK9*, *APOB*, and *LDLRAP1*). Although the presence  
5 of causative variants in FH-related genes correlates with future cardiovascular events, it  
6 remains unclear whether detection of causative gene mutation and disclosure of its associated  
7 cardiovascular risk affects the future cardiovascular risk in patients with FH. Therefore, this  
8 study intends to evaluate the efficacy of genetic testing and counseling in addition to standard  
9 patients' education program in patients with FH.

10 **Methods and analysis:** A randomized, waiting-list controlled, open-label, single-center trial  
11 will be conducted. We will recruit patients with clinically diagnosed FH without previous  
12 history of coronary heart disease from March 2018 to December 2019, and we plan to follow-  
13 up participants until March 2021. For the intervention group, we will perform genetic  
14 counseling and will inform an estimated future cardiovascular risk based on individuals'  
15 genetic testing results. The primary endpoint of this study is the plasma low-density  
16 lipoprotein (LDL) cholesterol level at 24 weeks after randomization. The secondary  
17 endpoints assessed at 24 and 48 weeks are as follows: blood test results; smoking status;  
18 changes of lipid-lowering agents' regimen; and Patients Satisfaction Questionnaire Short  
19 Form scores among the four groups divided by the presence of genetic counseling and  
20 genetic status of FH.

21 **Ethics and dissemination:** This study will be conducted in compliance with the Declaration  
22 of Helsinki, the Ethical Guidelines for Medical and Health Research Involving Human  
23 Subjects, and all other applicable laws and guidelines in Japan. This study protocol was  
24 approved by the Institutional Review Board at Kanazawa University Hospital, Japan. We will  
25 disseminate the final results at international conferences and in a peer-reviewed journal.

1  
2  
3  
4  
5  
6  
7  
8  
9  
10  
11  
12  
13  
14  
15  
16  
17  
18  
19  
20  
21  
22  
23  
24  
25  
26  
27  
28  
29  
30  
31  
32  
33  
34  
35  
36  
37  
38  
39  
40  
41  
42  
43  
44  
45  
46  
47  
48  
49  
50  
51  
52  
53  
54  
55  
56  
57  
58  
59  
60

1 **Trial registration:** This study was registered at the University Hospital Medical Information  
2 Network (UMIN) Clinical Trials Registry (UMIN ID: UMIN000029375).

4 **Keywords:** Familial hypercholesterolemia, genetic testing, genetic counseling,  
5 cardiovascular risk

7 **Strengths and limitations of this study:**

- 8 • This would be the first randomized, waiting-list controlled study to assess whether  
9 disclosing the genetic risk of future cardiovascular diseases by genetic testing results  
10 correlates with reduced LDL cholesterol levels in patients with FH over standard FH  
11 education.
- 12 • If this study demonstrates the clinical efficacy of genetic testing with informing future  
13 cardiovascular risk based on the genetic results, it will be imperative not only to confirm the  
14 FH diagnosis by genetic testing but also to provide thought-provoking evidence that genetic  
15 testing could enhance the prognosis of patients with FH.
- 16 • For patients without causal variants in FH-related genes, disclosure of relatively low-risk  
17 for future cardiovascular risk may inversely increase plasma LDL cholesterol levels  
18 compared to high-risk individuals with causal variants in FH-related genes. This may  
19 attenuate the intervention effect on the primary endpoint.

## 1 INTRODUCTION

2 Familial hypercholesterolemia (FH) is an autosomal dominant inherited disorder, and the  
3 prevalence of patients with heterozygous FH (HeFH) in the general population is  
4 approximately 0.5-0.2% (1 in 200–500 individuals).<sup>1-5</sup> The major causative genes of FH are  
5 low-density lipoprotein (LDL) receptor (*LDLR*), proprotein convertase subtilisin/kexin type 9  
6 (*PCSK9*), apolipoprotein B (*APOB*), and LDLR adaptor protein 1 (*LDLRAP1*). As FH is  
7 characterized by hyper LDL-cholesterolemia and systemic xanthomas from infancy, it is one  
8 of the leading causes of premature coronary artery disease.<sup>6</sup> Typically, patients with FH are  
9 prescribed lipid-lowering agents at an early stage to reduce plasma LDL cholesterol levels,  
10 which could prevent future occurrence of systemic arteriosclerosis including coronary artery  
11 disease. Hence, it is imperative to give a precise diagnosis of FH as early as possible.<sup>7</sup>

12 According to the Japanese Atherosclerosis Society guideline, the clinical diagnosis of  
13 FH in patients aged >15 years are made if the two of the following three criteria are met: (a)  
14 hyper LDL-cholesterolemia; (b) presence of tendon xanthomas; and (c) family history of FH  
15 or premature coronary artery disease.<sup>1</sup> Although genetic testing by the Sanger sequencing  
16 method is crucial for the definitive diagnosis of FH, it is performed only in some limited  
17 institutions because of its cost, large effort, and complexity. In addition, it remains unclear  
18 whether genetic testing offers some advantages on the diagnosis or outcomes in patients  
19 where FH has already been diagnosed clinically.

20 In recent years, advancements in comprehensive genetic analysis technology using a  
21 high-throughput sequencer (HTS) have facilitated checking variants in candidate genes cost-  
22 effectively and promptly. Previously, we conducted comprehensive genetic testing for  
23 patients clinically diagnosed with FH and suggested that the carriers of causative variants in  
24 FH-related genes (*LDLR*, *PCSK9*, *APOB*, or *LDLRAP1*) could be associated with future  
25 cardiovascular events.<sup>8</sup> In addition, the presence of causative variants in FH-related genes has

1  
2  
3 1 been reported to be associated with cardiovascular events, irrespective of LDL cholesterol  
4  
5 2 levels.<sup>9</sup> Based on these results, genetic testing could be useful from the perspective of  
6  
7 3 cardiovascular risk estimates and stratification of patients with FH. However, it remains  
8  
9 4 unclear whether genetic testing with informing future cardiovascular risk affects the  
10  
11 5 prognosis in patients with FH.  
12

13 6 Thus, this study aims to evaluate whether genetic testing with informing genetically  
14  
15 7 estimated future cardiovascular risk besides usual patient education correlates with reduced  
16  
17 8 LDL cholesterol levels in patients with FH.  
18  
19  
20  
21

## 22 10 **METHODS AND ANALYSIS**

### 23 11 **Overall study design**

24  
25  
26  
27 12 This study is a randomized, waiting list controlled, open-label, single-center trial. For the  
28  
29 13 intervention group, we will perform genetic counseling as well as informing individual  
30  
31 14 genetically estimated future cardiovascular risk based on patients' genetic testing results.  
32

33 15 Figure 1 shows the scheme of this study, and Table 1 outlines the overall follow-up schedule.

34  
35 16 The primary outcome of this study is the plasma LDL cholesterol level at 24 weeks after  
36  
37 17 randomization. In addition, we hypothesize that the intervention group would have lower  
38  
39 18 LDL cholesterol levels compared with the control group at 24 weeks.  
40  
41  
42  
43  
44  
45  
46  
47  
48  
49  
50  
51  
52  
53  
54  
55  
56  
57  
58  
59  
60

1 **Table 1 Assessment and evaluation schedule of this study**

2

|                                           | 12 Weeks before<br>randomization                     | Day 0 (Week 0)                  | Week 8<br>Week 16       | Week 24             | Week 32<br>Week 40  | Week 48   |
|-------------------------------------------|------------------------------------------------------|---------------------------------|-------------------------|---------------------|---------------------|-----------|
|                                           | Diagnosed with<br>clinical FH (pre-<br>registration) | Randomization<br>(registration) | Observation<br>I period | Primary<br>endpoint | Crossover<br>period | Trial end |
| <b>Informed consent</b>                   | X                                                    |                                 |                         |                     |                     |           |
| <b>Patient background</b>                 | X                                                    |                                 |                         |                     |                     |           |
| <b>Check adverse events</b>               | ←—————→                                              |                                 |                         |                     |                     |           |
| Height                                    | X                                                    |                                 |                         |                     |                     |           |
| Body weight                               | X                                                    | X                               | X                       | X                   | X                   | X         |
| BP/HR                                     | X                                                    | X                               | X                       | X                   | X                   | X         |
| Symptoms                                  | X                                                    | X                               | X                       | X                   | X                   | X         |
| Physical examination                      | X                                                    | X                               | X                       | X                   | X                   | X         |
| <b>Blood tests</b>                        |                                                      |                                 |                         |                     |                     |           |
| Lipid profile                             | X                                                    | X                               | X                       | X                   | X                   | X         |
| FPG/HbA1c                                 | X                                                    | X                               | X                       | X                   | X                   | X         |
| CBC                                       | X                                                    | X                               | X                       | X                   | X                   | X         |
| Chemistry                                 | X                                                    | X                               | X                       | X                   | X                   | X         |
| Genetic testing                           | X                                                    |                                 |                         |                     |                     |           |
| <b>Lipid-lowering therapy<br/>regimen</b> | X                                                    | X                               | X                       | X                   | X                   | X         |
| <b>PSQ-18</b>                             | X                                                    | X                               | X                       | X                   | X                   | X         |
| <b>Smoking status</b>                     | X                                                    | X                               | X                       | X                   | X                   | X         |

3 Abbreviations: BP, blood pressure; CBC, complete blood counts; FH, familial

4 hypercholesterolemia; FPG, fasting plasma glucose; HR, heart rate; PSQ-18, the Patient

5 Satisfaction Questionnaire Short Form

6



1  
2  
3 1 This study will be conducted in compliance with the Declaration of Helsinki, the  
4  
5 2 Ethical Guidelines for Medical and Health Research Involving Human Subjects, and all other  
6  
7 3 applicable laws and guidelines in Japan. In addition, this study protocol was approved by the  
8  
9 4 Institutional Review Board (IRB) at Kanazawa University Hospital (Kanazawa, Japan) and  
10  
11 5 was registered at the University Hospital Medical Information Network (UMIN) Clinical  
12  
13 6 Trials Registry (UMIN ID: UMIN000029375).  
14  
15  
16  
17

### 18 **Study participants**

19  
20 9 We will recruit patients with clinically diagnosed FH from March 2018 to December 2019,  
21  
22 10 and we plan to follow-up participants until March 2021. Of note, only participants fulfilling  
23  
24 11 all inclusion criteria will be enrolled in this study (Table 2), and those with either of the  
25  
26 12 exclusion criteria were excluded from this trial (Table 3). In addition, we will obtain written  
27  
28 13 informed consent from all trial participants and these forms were approved by the IRB at the  
29  
30 14 Kanazawa University Hospital. It will be mandatory for trial participants to understand the  
31  
32 15 contents of the consent form before giving their acceptance; moreover, it will have to be  
33  
34 16 dated and signed by both trial participants and investigators. Upon obtaining consent, the first  
35  
36 17 copy of the consent form will be kept in the hospital and the other part was kept by the  
37  
38 18 patient and will not collect after the completion of the trial. Furthermore, all participants will  
39  
40 19 be informed that their medical care will not be affected if they refused to enroll in the trial  
41  
42 20 and that they will be free to withdraw their consent at any time of the study period, at their  
43  
44 21 discretion.  
45  
46  
47  
48  
49  
50  
51  
52  
53  
54  
55  
56  
57  
58  
59  
60

1 **Table 2 Inclusion criteria**

|                                                                                                                                   |        |
|-----------------------------------------------------------------------------------------------------------------------------------|--------|
|                                                                                                                                   | 2      |
| <hr/>                                                                                                                             |        |
| We include the patients with all the following criteria:                                                                          | 3      |
| 1) Age $\geq 15$ years                                                                                                            | 4      |
| 2) Diagnosed with familial hypercholesterolemia per the criteria of the Japan<br>Atherosclerosis Society                          | 5<br>6 |
| 3) Patients who have never got genetic tests, or have not yet returned genetic<br>results regarding familial hypercholesterolemia | 7<br>8 |
| 4) Patients who can provide written informed consent                                                                              | 9      |
| <hr/>                                                                                                                             |        |

10

11 **Table 3 Exclusion criteria**

|                                                                                    |  |
|------------------------------------------------------------------------------------|--|
| <hr/>                                                                              |  |
| We exclude patients with either of the following criteria:                         |  |
| 1) Liver dysfunction (AST or ALT > 3 times the UNL)                                |  |
| 2) Renal dysfunction (Cr, $\geq 2.0$ mg/dL)                                        |  |
| 3) Immunosuppression                                                               |  |
| 4) Active cancer                                                                   |  |
| 5) Previous history of coronary heart disease:                                     |  |
| i) Myocardial infarction                                                           |  |
| ii) History of percutaneous coronary intervention                                  |  |
| iii) Coronary stenosis ( $\geq 75\%$ ) previously detected by coronary angiography |  |
| 6) Female with pregnancy or expected                                               |  |
| 7) Patients whose doctors in charge consider him/her inappropriate to participate  |  |
| <hr/>                                                                              |  |

12

13 Abbreviations as Table 1

1

## 2 **Screening FH causal variant**

3 We will sequence exons of four FH-related genes (*LDLR*, *PCSK9*, *APOB*, and *LDLRAP1*)  
4 using the Illumina MiSeq system. The variant is defined as FH causal when it fulfills either of  
5 the following criteria: (a) registered as pathogenic/likely pathogenic in the ClinVar database;  
6 (b) minor allele frequency <1% in the East Asian population with (i) protein-truncating  
7 variants (nonsense, canonical splice sites, or frameshift), and (ii) missense variants that 5 *in*  
8 *silico* damaging scores (SIFT, PolyPhen-2 HDIV, PolyPhen-2 HVAR, MutationTaster2,  
9 LRT), all predicted as pathogenic;<sup>9</sup> (c) missense variants reported as pathogenic in the  
10 Japanese population: *PCSK9* p.Val4Ile and p.Glu32Lys;<sup>10 11</sup> and (d) eXome-Hidden Markov  
11 Model (XHMM) software predicted as copy number variations (large duplication/large  
12 deletion).<sup>12</sup>

## 14 **Intervention and control**

15 Regarding the intervention group, we will perform genetic counseling besides standard FH  
16 patient education. In addition, a single qualified doctor will inform genetically estimated  
17 future cardiovascular risk based on the result of genetic testing. Genetic counseling will  
18 comprise the following: (a) genetic diagnosis; (b) outline of what FH is; (c) checking family  
19 history of hyperlipidemia/cardiovascular diseases; (d) informing that the results of genetic  
20 testing could facilitate the research in this field; and (e) explaining the physical/mental  
21 support system in our hospital. Of note, this counseling will be provided by a qualified  
22 physician of clinical genetics. In addition, we will inform individual future cardiovascular  
23 risk, based on the presence or absence of a causal genetic variant by using the original  
24 Japanese documents (Supplemental Data 1).<sup>8 9</sup> After counseling we will set time to answer  
25 the queries of patients adequately, confirming their level of understanding.

1  
2  
3 1 Regarding the control group, we will only disseminate standard FH patient education  
4  
5 2 using the Japanese booklet for FH patient education according to the FH management  
6  
7 3 guideline (Supplemental Data 2);<sup>1</sup> this education will be provided by a clinical cardiology  
8  
9 4 physician specialist. After the education, we will set time to answer the queries of patients  
10  
11 5 adequately. Furthermore, it will be possible to receive additional counseling when patients  
12  
13 6 were afraid of genetic testing, regardless of the intervention or control groups.  
14  
15  
16  
17

## 18 **Outcomes**

19  
20 9 The primary endpoint of this study is the plasma LDL cholesterol levels at 24 weeks. In  
21  
22 10 addition, secondary endpoints assessed at 24 and 48 weeks are as follows: blood test results;  
23  
24 11 smoking status; changes of lipid-lowering agents' regimen; and Patients Satisfaction  
25  
26 12 Questionnaire Short Form (PSQ-18) scores (Supplemental Data 3) between the intervention  
27  
28 13 and control groups or among the four groups taking genetic testing results (positive /  
29  
30 14 negative) into consideration ([1] intervention + positive; [2] intervention + negative; [3]  
31  
32 15 control + positive; and [4] control + negative).  
33  
34  
35  
36  
37

## 37 **Follow-up schedule**

38  
39 18 Table 1 lists the overall follow-up schedule for this study. Follow-up visits will be conducted  
40  
41 19 in an outpatient clinic at the Kanazawa University Hospital. We will check patients'  
42  
43 20 background profiles, height, body weight, blood pressure (BP), heart rate (HR),  
44  
45 21 subjective/objective symptoms, complete blood counts, chemistry, lipid profile, fasting  
46  
47 22 glucose, hemoglobin A1C, lipid-lowering agents' regimen, PSQ-18, smoking status, and  
48  
49 23 genetic testing. In addition, data regarding patients' background profiles, including age, sex,  
50  
51 24 and medical history, will be obtained. We expect to arrange regular follow-up visits at eight  
52  
53 25 weeks ( $\pm 14$  days), 16 weeks ( $\pm 14$  days), 24 weeks ( $\pm 14$  days), 32 weeks ( $\pm 14$  days), 40  
54  
55  
56  
57  
58  
59  
60

1 weeks ( $\pm 14$  days), and 48 weeks ( $\pm 14$  days) to evaluate patients' body weight, BP/HR, symptoms, blood test results, prescription, PSQ-18, and smoking status. Furthermore, we will evaluate the primary outcome at 24 weeks and recorded adverse events and concomitant medication throughout the trial.

### 6 **Sample size and power**

7 The plasma LDL cholesterol levels at 24 weeks are the primary endpoint of this study. Of note, the estimated difference in the LDL cholesterol level between the intervention and control groups was 15 mg/dL with a standard deviation of 25. In the sample size calculation, we determined that the required patients per group were 44 with 95% confidence interval and power of 80%. Moreover, we set the drop rate as 10%, and approximately 100 patients with FH were required for this trial.

### 14 **Randomization**

15 We will randomize patients with FH using an independent web-based randomization system that included a minimization algorithm balanced for age ( $\geq 50$  years and  $< 50$  years), gender (male and female), and causative variant, positive or negative. This system automatically allocates patients' to either the intervention or control groups. Of note, researchers gathering clinical data and performing laboratory analyses will be blinded to the allocation.

### 21 **Statistical analysis**

22 We will compare the outcomes between intervention and control groups. The baseline profiles are described by the mean and standard deviation, or median and quantiles (continuous variables), or proportion (categorical variables). In addition, we will assess the primary endpoint based on the intention-to-treat fashion, which was compared between the

1 groups using the *t*-test. Moreover, we will compare secondary endpoints between the groups  
2 at each defined period using the *t*-test, Mann–Whitney *U*-test, Fisher’s exact test, or linear or  
3 logistic regression adjusted by appropriate covariates. Finally,  $P < 0.05$  will be considered  
4 statistically significant for the primary endpoint. Statistical analysis will be performed using  
5 R software version 3.4.1 (The R Project for Statistical Computing, Vienna, Austria).

### 6 7 **Patient and public involvement**

8 Patients and public will not be involved in the development of the research question and  
9 outcome measures; the design of this study; the assessment of the intervention in this study;  
10 or the recruitment to and conduct of the study. We will disseminate the final results to the  
11 study participants after the results are published in a peer-reviewed journal.

### 12 13 **DISCUSSION**

14 For this study to demonstrate the clinical efficacy of genetic testing with informing  
15 cardiovascular risk, it is imperative not only to confirm the FH diagnosis by genetic testing  
16 but also to provide thoughtful evidence that genetic testing could enhance the prognosis of  
17 patients with FH. Furthermore, it might be possible to further advance precision medicine  
18 based on causal gene variants currently proposed mainly in the United States.<sup>13</sup>

19 This study will enroll patients with FH without a history of coronary heart diseases  
20 (CHD). Reportedly, patients with FH are at high risk of CHD compared with those without  
21 FH.<sup>1 14</sup> In addition, patients with FH with causal variant positive in FH-related genes are  
22 more likely to be diagnosed with CHD than those without a causal variant in FH-related  
23 genes.<sup>8 9</sup> Thus, the target plasma LDL cholesterol level is  $< 100$  mg/dL for primary prevention  
24 in patients with FH.<sup>1</sup> However, the achievement rate of target LDL cholesterol levels remains  
25 around 20%, despite appropriate lipid-lowering drug prescription.<sup>15</sup> Beyond lipid-lowering

1 agents, encouraging behavioral changes by the disclosure of genetic testing results is the  
2 focus of attention. In a recent randomized trial, Kullo et al. reported that the disclosure of  
3 future CHD risk by evaluating the genetic risk score correlated with the declining LDL  
4 cholesterol level at six months in patients with general hypercholesterolemia.<sup>16</sup> The results of  
5 our study could prove that the risk stratification by genetic testing result and the disclosure of  
6 future cardiovascular risk can promote patients' behavioral changes and can elucidate the  
7 benefit of attaining the target of LDL cholesterol, and thus might further reduce plasma LDL  
8 cholesterol levels.

9 In this study, the primary endpoint is the changes in the plasma LDL cholesterol  
10 levels following the disclosure of future CHD risk based on a genetic testing result.  
11 Reportedly, LDL cholesterol is a primary risk factor for CHD, and lipid-lowering therapy and  
12 a healthy lifestyle play a crucial role in reducing LDL cholesterol level.<sup>16 17</sup> We have already  
13 standardized assays previously to assess the lipid profile and we evaluated the LDL  
14 cholesterol level directly or by the Friedewald formula.<sup>18</sup> In addition, we will assess whether  
15 changes in LDL cholesterol are because of changes in the lipid-lowering therapy regimen,  
16 behavior change, lifestyle modification, or a combination of them. Furthermore, we assessed  
17 patients' mental status such as satisfaction or anxiety to genetic testing, genetic counseling,  
18 disclosure of future CHD risk, a change in the treatment regimen, and doctor-patient  
19 relationship at outpatient clinic visits.

20 The strength of genetic testing is that we will not only be able to precisely inform the  
21 personalized genetic information and future CHD risk but will also be able to ameliorate  
22 participants' inner bad emotions for their diseases and decision makings over treatment. Thus  
23 we will check the PSQ-18 as one of the secondary endpoints to objectively assess patients'  
24 understanding and satisfaction for the daily medical practice, disclosure of genetic risk,  
25 treatment decisions, and medical costs. Lewis et al. reported that genetic counseling after

1 standard education might improve the satisfaction of individuals who have received their  
2 carrier results.<sup>19</sup> Our study might provide interesting perspectives of returning genetic results  
3 with the disclosure of future CHD risk for patients with FH, who have reliable and evidence-  
4 based treatment options to prevent the risk.

5 In conclusion, we aimed to demonstrate the study design and protocol of the Impact  
6 of Genetic Testing on Low-density Lipoprotein Cholesterol in Patients with FH (GenTLe-  
7 FH) study. This study would be the first randomized controlled trial investigating the clinical  
8 efficacy of genetic testing and the disclosure of future CHD risk in patients with FH. We  
9 hypothesize that the genetic testing/counseling intervention group has a lower plasma LDL  
10 cholesterol level than the control group at six months after randomization. Finally, this study  
11 will provide insights into the importance of genetic testing and its disclosure in patients with  
12 FH.

#### 13 14 **ACKNOWLEDGEMENTS**

15 We express our gratitude to all the staff and participants in this study.

#### 16 17 **COMPETING INTERESTS STATEMENT**

18 Authors have no conflict of interest to disclose.

#### 19 20 **FUNDING STATEMENT**

21 None.

#### 22 23 **AUTHORS' CONTRIBUTIONS**



1  
2  
3 1 A. Nomura, H. Tada, A. Nohara, and MA. Kawashiri designed and conducted the study. K.  
4  
5 2 Yoshimura and H. Ishikawa gave us critical comments on statistical methods. All authors  
6  
7 3 performed a critical review and approved the final version of the manuscript.  
8  
9  
10  
11  
12  
13  
14  
15  
16  
17  
18  
19  
20  
21  
22  
23  
24  
25  
26  
27  
28  
29  
30  
31  
32  
33  
34  
35  
36  
37  
38  
39  
40  
41  
42  
43  
44  
45  
46  
47  
48  
49  
50  
51  
52  
53  
54  
55  
56  
57  
58  
59  
60

For peer review only

## 1 REFERENCES

- 2 1. Harada-Shiba M, Arai H, Oikawa S, et al. Guidelines for the management of familial  
3 hypercholesterolemia. *J Atheroscler Thromb* 2012;19(12):1043-60.
- 4 2. Gidding SS, Champagne MA, de Ferranti SD, et al. The Agenda for Familial  
5 Hypercholesterolemia: A Scientific Statement From the American Heart Association.  
6 *Circulation* 2015;132(22):2167-92. doi: 10.1161/CIR.0000000000000297
- 7 3. Watts GF, Gidding S, Wierzbicki AS, et al. Integrated guidance on the care of familial  
8 hypercholesterolaemia from the International FH Foundation. *Int J Cardiol*  
9 2014;171(3):309-25. doi: 10.1016/j.ijcard.2013.11.025
- 10 4. Nordestgaard BG, Chapman MJ, Humphries SE, et al. Familial hypercholesterolaemia is  
11 underdiagnosed and undertreated in the general population: guidance for clinicians to  
12 prevent coronary heart disease: consensus statement of the European Atherosclerosis  
13 Society. *Eur Heart J* 2013;34(45):3478-90a. doi: 10.1093/eurheartj/eh273
- 14 5. Mabuchi H, Nohara A, Noguchi T, et al. Molecular genetic epidemiology of homozygous  
15 familial hypercholesterolemia in the Hokuriku district of Japan. *Atherosclerosis*  
16 2011;214(2):404-7. doi: 10.1016/j.atherosclerosis.2010.11.005
- 17 6. Versmissen J, Oosterveer DM, Yazdanpanah M, et al. Efficacy of statins in familial  
18 hypercholesterolaemia: a long term cohort study. *BMJ* 2008;337:a2423. doi:  
19 10.1136/bmj.a2423
- 20 7. Teramoto T, Kobayashi M, Tasaki H, et al. Efficacy and Safety of Alirocumab in Japanese  
21 Patients With Heterozygous Familial Hypercholesterolemia or at High Cardiovascular  
22 Risk With Hypercholesterolemia Not Adequately Controlled With Statins-  
23 ODYSSEY JAPAN Randomized Controlled Trial. *Circ J* 2016;80(9):1980-7. doi:  
24 10.1253/circj.CJ-16-0387

- 1  
2  
3 1 8. Tada H, Kawashiri MA, Nohara A, et al. Impact of clinical signs and genetic diagnosis of  
4  
5 2 familial hypercholesterolaemia on the prevalence of coronary artery disease in  
6  
7 3 patients with severe hypercholesterolaemia. *Eur Heart J* 2017 doi:  
8  
9 4 10.1093/eurheartj/ehx004
- 10  
11 5 9. Khera AV, Won HH, Peloso GM, et al. Diagnostic Yield and Clinical Utility of  
12  
13 6 Sequencing Familial Hypercholesterolemia Genes in Patients With Severe  
14  
15 7 Hypercholesterolemia. *J Am Coll Cardiol* 2016;67(22):2578-89. doi:  
16  
17 8 10.1016/j.jacc.2016.03.520
- 18  
19  
20 9 10. Mabuchi H, Nohara A, Noguchi T, et al. Genotypic and phenotypic features in  
21  
22 10 homozygous familial hypercholesterolemia caused by proprotein convertase  
23  
24 11 subtilisin/kexin type 9 (PCSK9) gain-of-function mutation. *Atherosclerosis*  
25  
26 12 2014;236(1):54-61. doi: 10.1016/j.atherosclerosis.2014.06.005
- 27  
28  
29 13 11. Ohta N, Hori M, Takahashi A, et al. Proprotein convertase subtilisin/kexin 9 V4I variant  
30  
31 14 with LDLR mutations modifies the phenotype of familial hypercholesterolemia. *J*  
32  
33 15 *Clin Lipidol* 2016;10(3):547-55 e5. doi: 10.1016/j.jacl.2015.12.024
- 34  
35  
36 16 12. Fromer M, Moran JL, Chambert K, et al. Discovery and statistical genotyping of copy-  
37  
38 17 number variation from whole-exome sequencing depth. *Am J Hum Genet*  
39  
40 18 2012;91(4):597-607. doi: 10.1016/j.ajhg.2012.08.005
- 41  
42 19 13. Jameson JL, Longo DL. Precision medicine--personalized, problematic, and promising. *N*  
43  
44 20 *Engl J Med* 2015;372(23):2229-34. doi: 10.1056/NEJMs1503104
- 45  
46 21 14. Goldberg AC, Hopkins PN, Toth PP, et al. Familial hypercholesterolemia: screening,  
47  
48 22 diagnosis and management of pediatric and adult patients: clinical guidance from the  
49  
50 23 National Lipid Association Expert Panel on Familial Hypercholesterolemia. *J Clin*  
51  
52 24 *Lipidol* 2011;5(3):133-40. doi: 10.1016/j.jacl.2011.03.001

- 1  
2  
3 1 15. Galema-Boers AM, Lenzen MJ, Engelkes SR, et al. Cardiovascular risk in patients with  
4  
5 2 familial hypercholesterolemia using optimal lipid-lowering therapy. *J Clin Lipidol*  
6  
7 3 2018 doi: 10.1016/j.jacl.2017.12.014  
8  
9 4 16. Kullo IJ, Jouni H, Austin EE, et al. Incorporating a Genetic Risk Score Into Coronary  
10  
11 5 Heart Disease Risk Estimates: Effect on Low-Density Lipoprotein Cholesterol Levels  
12  
13 6 (the MI-GENES Clinical Trial). *Circulation* 2016;133(12):1181-8. doi:  
14  
15 7 10.1161/CIRCULATIONAHA.115.020109  
16  
17 8 17. Stone NJ, Robinson JG, Lichtenstein AH, et al. 2013 ACC/AHA guideline on the  
18  
19 9 treatment of blood cholesterol to reduce atherosclerotic cardiovascular risk in adults: a  
20  
21 10 report of the American College of Cardiology/American Heart Association Task  
22  
23 11 Force on Practice Guidelines. *J Am Coll Cardiol* 2014;63(25 Pt B):2889-934. doi:  
24  
25 12 10.1016/j.jacc.2013.11.002  
26  
27 13 18. Friedewald WT, Levy RI, Fredrickson DS. Estimation of the concentration of low-density  
28  
29 14 lipoprotein cholesterol in plasma, without use of the preparative ultracentrifuge. *Clin*  
30  
31 15 *Chem* 1972;18(6):499-502.  
32  
33 16 19. Lewis KL, Umstead KL, Johnston JJ, et al. Outcomes of Counseling after Education  
34  
35 17 about Carrier Results: A Randomized Controlled Trial. *Am J Hum Genet* 2018 doi:  
36  
37 18 10.1016/j.ajhg.2018.02.009  
38  
39  
40  
41  
42  
43  
44  
45  
46  
47  
48  
49  
50  
51  
52  
53  
54  
55  
56  
57  
58  
59  
60

1  
2  
3  
4  
5  
6  
7  
8  
9  
10  
11  
12  
13  
14  
15  
16  
17  
18  
19  
20  
21  
22  
23  
24  
25  
26  
27  
28  
29  
30  
31  
32  
33  
34  
35  
36  
37  
38  
39  
40  
41  
42  
43  
44  
45  
46  
47  
48  
49  
50  
51  
52  
53  
54  
55  
56  
57  
58  
59  
60

1 **FIGURE LEGEND**

2 **Figure 1. Scheme of this study protocol.**

For peer review only

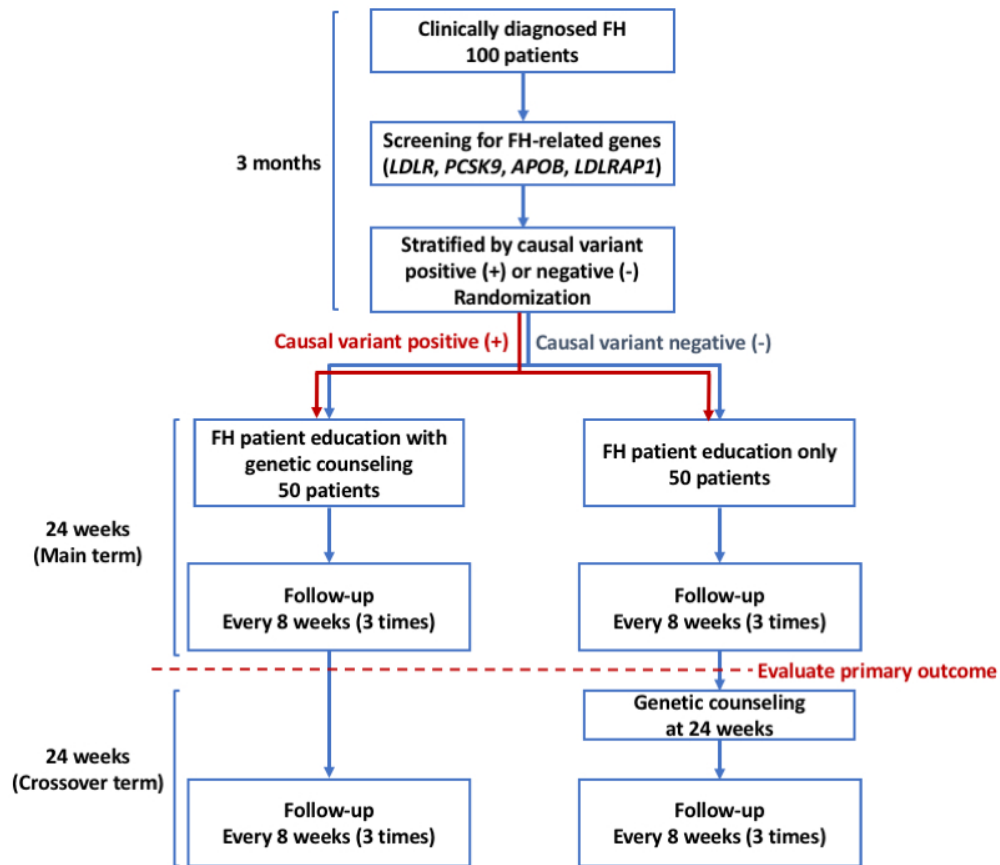

Figure 1

282x250mm (72 x 72 DPI)

患者説明資料 別紙1 (家族性高コレステロール血症における遺伝子検査の有用性の検討)

# 家族性高コレステロール血症に関する 遺伝子変異と心臓病

- 血清LDLコレステロール値に比例して心臓病(冠動脈疾患)は増加する
- 同じ血清LDLコレステロール値であっても、家族性高コレステロール血症に関する遺伝子変異があると、変異がない方々に比べて心臓病(冠動脈疾患)に約2-3倍なりやすい\*

\*Khera, A.V., Nomura A, et al. *J Am Coll Cardiol*. 2016. Hayato T, et al. *Eur Heart J*. 2016.

患者説明資料 別紙1 (家族性高コレステロール血症における遺伝子検査の有用性の検討)

# 遺伝子変異の有無は、心血管疾患の発症オッズに関係する

遺伝子変異なし & <130mg/dL群を1とした場合の  
各群の心血管疾患発症オッズ比

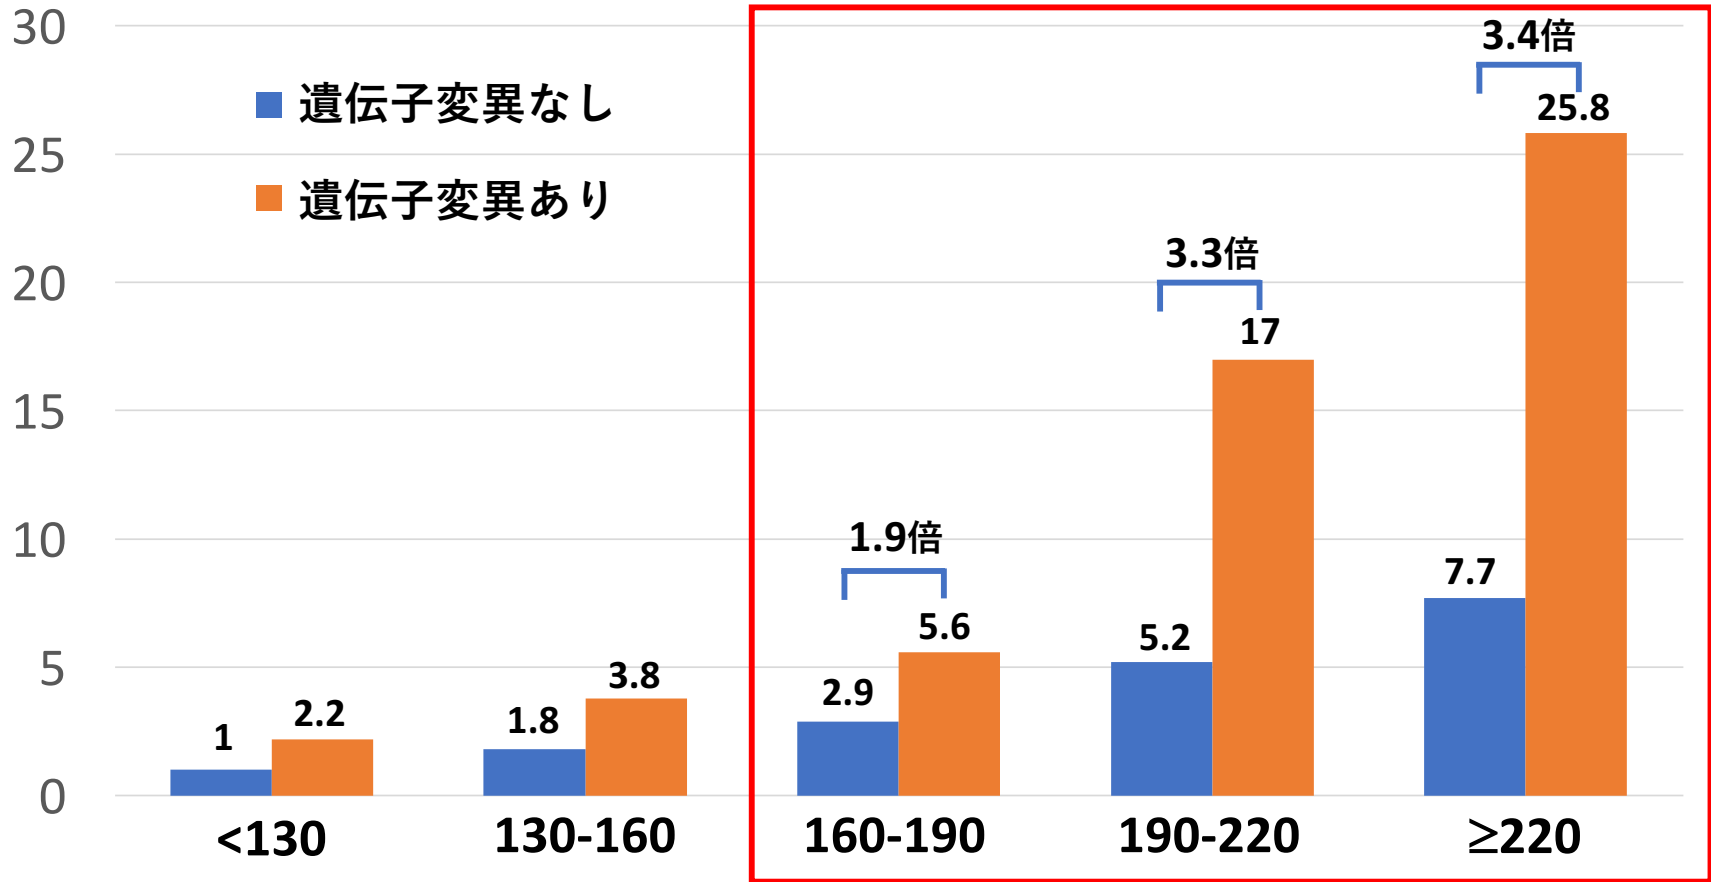

血清LDLコレステロール値 (mg/dL)

家族性高コレステロール血症

Khera, A.V., Nomura A, et al. *J Am Coll Cardiol.* 2016. を一部改変



患者説明資料 別紙1 (家族性高コレステロール血症における遺伝子検査の有用性の検討)

# 遺伝子変異の有無は、心血管疾患の発症オッズに関係する (日本人の家族性高コレステロール血症[FH]に限定)

遺伝子変異なし & 臨床症状なし群を1とした場合の  
各群の心血管疾患発症オッズ比

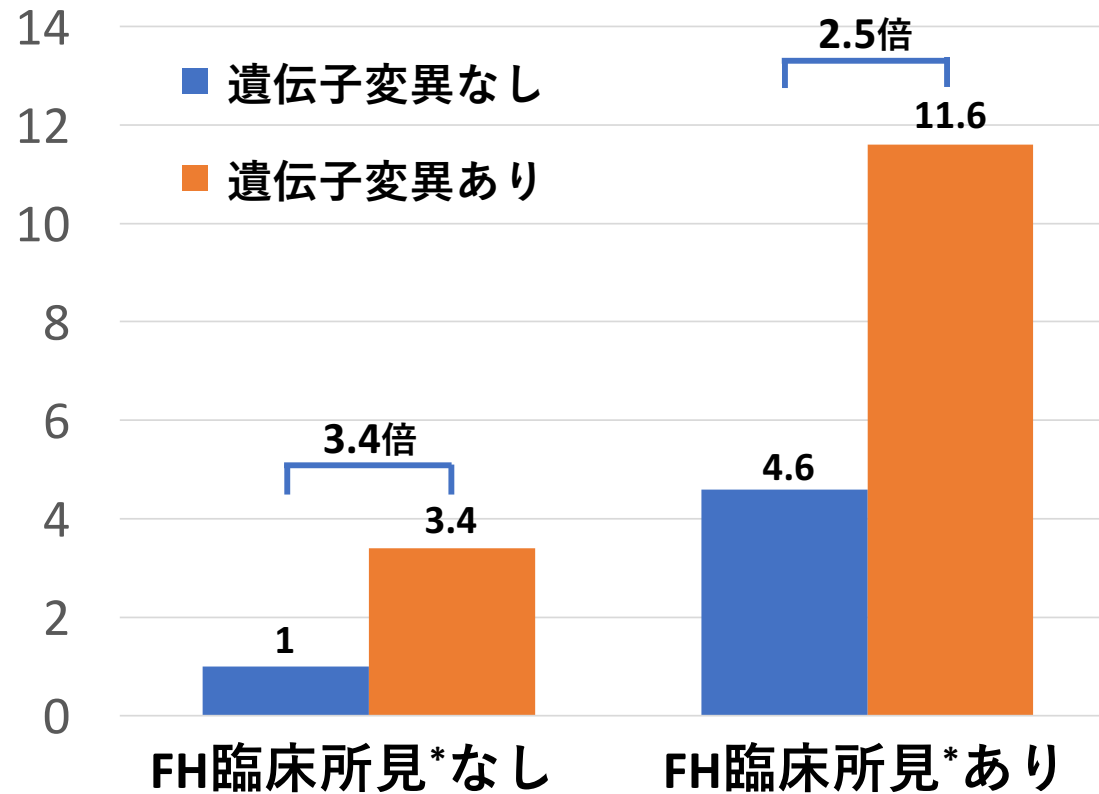

\*FHの家族歴または  
腱黄色腫の存在

Hayato T, et al. *Eur Heart J*. 2016. を一部改変

# 高コレステロール血症の はなし

監修：金沢大学大学院医薬保健学総合研究科  
名誉教授 馬淵 宏 医師

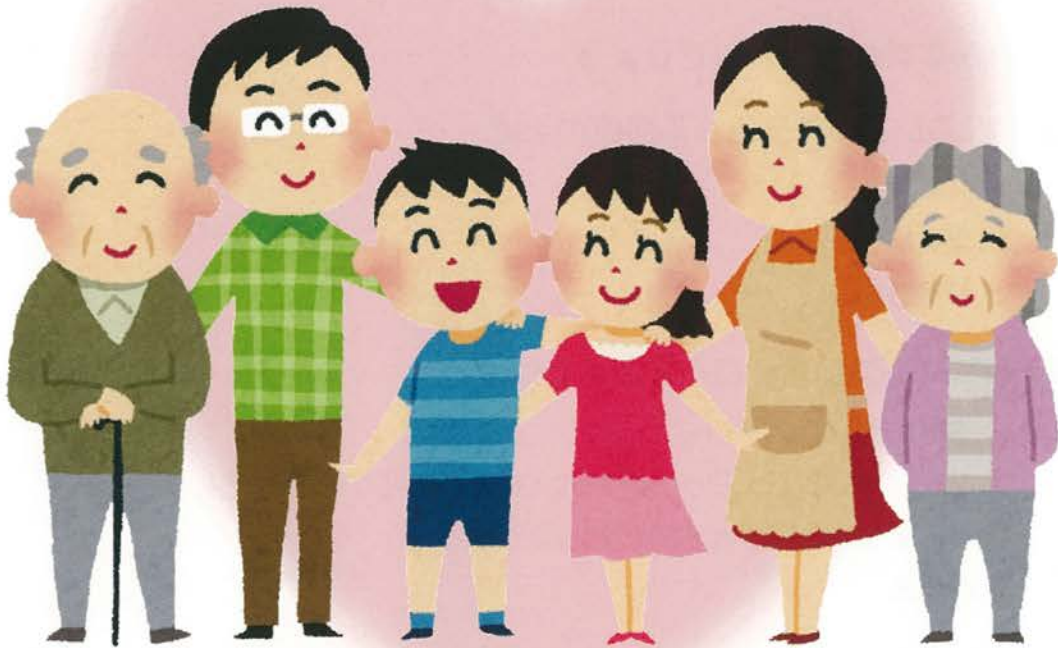

金 沢 市

## 目 次

|    |                                 |    |
|----|---------------------------------|----|
| 1. | はじめに .....                      | 2  |
|    | ● 金沢市の状況                        |    |
| 2. | コレステロールについて .....               | 6  |
|    | ● コレステロールとは何でしょう                |    |
| 3. | コレステロールが高いとなぜよくないのでしょうか .....   | 8  |
|    | ● 高コレステロール血症と動脈硬化               |    |
|    | ● 動脈硬化はどのように起こるのでしょうか           |    |
|    | ● 心臓と冠動脈                        |    |
|    | ● 狭心症や心筋梗塞                      |    |
|    | ● その他の動脈硬化症                     |    |
|    | ● 高 LDL コレステロール血症の管理目標          |    |
| 4. | どんな検査があるのでしょうか .....            | 11 |
| 5. | 高 LDL コレステロール血症の治療 .....        | 12 |
|    | ● 食事療法                          |    |
|    | ● 運動療法                          |    |
|    | ● 薬物療法                          |    |
| 6. | 家族性高コレステロール血症とは? .....          | 16 |
|    | ● 家族性高コレステロール血症                 |    |
|    | ● 家族性高コレステロール血症の人ほどのくらいいるのでしょうか |    |
|    | ● どのような症状が起こるのでしょうか             |    |
|    | ● 治療法                           |    |
| 7. | さいごに .....                      | 18 |

## 1. はじめに

血液検査で「LDLコレステロールが高いですね」と言われたことはありませんか？

しかし、高LDLコレステロール血症は進行するまで症状はありませんので、そのように言われてもピンとこないかもしれません。

LDLコレステロールや中性脂肪が高くなる脂質異常症は、放っておくと動脈硬化が進み、心筋梗塞や脳卒中など命にかかわる重大な病気を引き起こしてしまう可能性があります。

遺伝を含めた自分の体質や、生活習慣、現在治療中の病気なども含め、動脈硬化を起こさず、しなやかな血管のまま健康に生活するための自分にあった対処法を、ゆっくり考えてみましょう。

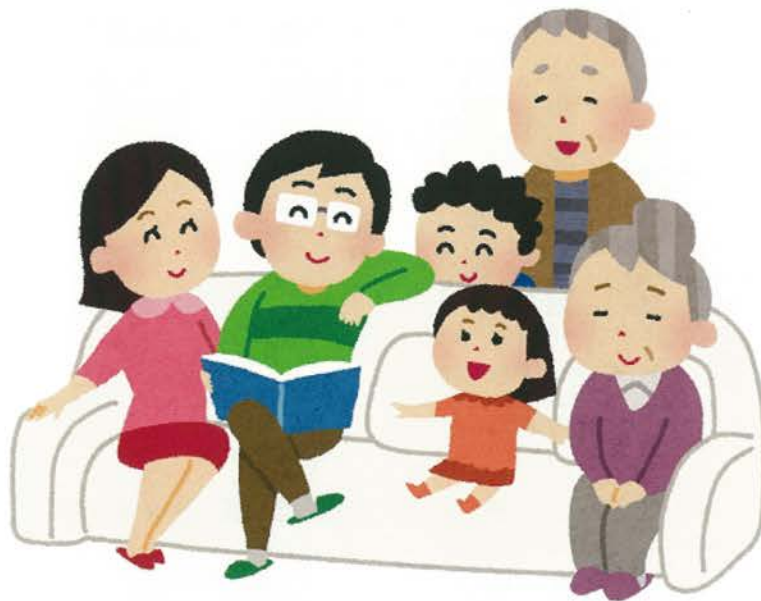

## 1. はじめに

図1 主要死因別死亡率(人口10万対)の年次推移

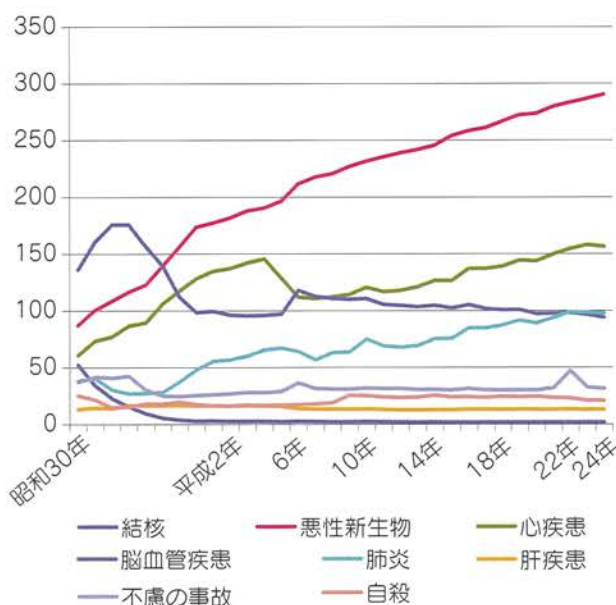

## 金沢市の状況

平成25年のわが国の死因の第1位は悪性新生物(ガン)、2位は心疾患、3位は脳血管疾患となっています(図1)。

このうち、心疾患と脳血管疾患といったガン以外の生活習慣病の原因の背景には、高LDLコレステロール血症が多くみられます。

また、金沢市国民健康保険被保険者における医療の状況(平成24年5月診療分)をみても、虚血性心疾患(狭心症や心筋梗塞)受療者の被保険者数に占める割合は、約21人に1人であり、女性より男性に多くなっています(図2)。

また、虚血性心疾患による受療者の74%は高血圧症の治療を受けており、過半数が脂質異常症又は糖尿病のいずれかの治療を受けています(表1)。

図2 虚血性心疾患による年代別受療者数と被保険者に占める割合

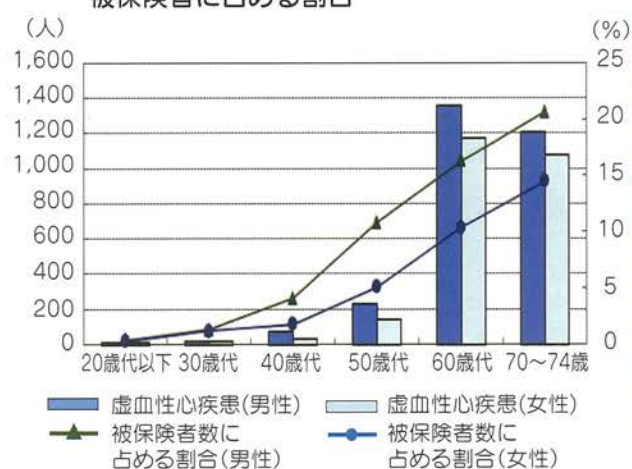

表1 虚血性心疾患による受療者の危険因子の重複状況

| 区分        | 男性    |      | 女性    |      | 総数    |      |
|-----------|-------|------|-------|------|-------|------|
|           | 人数    | 割合%  | 人数    | 割合%  | 人数    | 割合%  |
| 総数        | 2,894 | 100  | 2,455 | 100  | 5,349 | 100  |
| 高血圧症との重複  | 2,228 | 77.0 | 1,739 | 70.8 | 3,967 | 74.2 |
| 脂質異常症との重複 | 1,516 | 52.4 | 1,457 | 59.3 | 2,973 | 55.6 |
| 糖尿病との重複   | 1,770 | 61.2 | 1,220 | 49.7 | 2,990 | 55.9 |

とくに虚血性心疾患は、高LDLコレステロール血症と密接に関係しており、LDLコレステロールの高値は、脂質異常症の検査項目の中でも、もっとも重要な指標とされています。虚血性心疾患の発症・死亡リスクが明らかに上昇するのはLDLコレステロール160mg/dℓ以上からが多いという疫学研究結果もあります。

ここで、金沢市国民健康保険被保険者40～74歳の特定健康診査の結果から、高LDLコレステロール血症の状況を見てみましょう。

平成26年度の特定健康診査の結果から、LDLコレステロール160mg/dℓ以上の方は3,046人(11.4%)であり、そのうち糖尿病、高血圧症、脂質異常症などのいずれの治療も受けてない方は2,173人(8.1%)でした(表2)。

表2 健診結果からみた高LDLコレステロール血症の状況(平成26年度)

H26年度 特定健康診査受診者数 26,763人

\* 3疾患：高血圧症、糖尿病、脂質異常症

| LDL コレステロール値<br>(mg/dℓ) | 3疾患* 治療あり |      | 3疾患治療なし |      | 合 計    |      |
|-------------------------|-----------|------|---------|------|--------|------|
|                         | 人数        | 割合%  | 人数      | 割合%  | 人数     | 割合%  |
| 120 未満                  | 7,655     | 28.6 | 5,345   | 20.0 | 13,000 | 48.6 |
| 120～139                 | 3,178     | 11.9 | 3,277   | 12.2 | 6,455  | 24.1 |
| 140～159                 | 1,662     | 6.2  | 2,600   | 9.7  | 4,262  | 15.9 |
| 160 以上                  | 873       | 3.3  | 2,173   | 8.1  | 3,046  | 11.4 |
| (再掲)180以上               | 261       | 1.0  | 807     | 3.0  | 1,068  | 4.0  |

## 1. はじめに

わが国においても虚血性心疾患は次第に増加しており、高LDLコレステロール血症治療の重要性はますます高まっています。

近年、高LDLコレステロール血症については数多くの研究がなされています。とくに、ゴールドスタインとブラウン両博士による研究の成果はめざましく、コレステロールの代謝に関する「LDL受容体」の研究で、1985年にはノーベル医学賞が授与されました。と同時に高コレステロール血症の治療も急速に進展しており、素晴らしい薬が発見され診療に使われています。

この冊子では、コレステロールとは何か、LDLコレステロールが高いとどうしていけないのか、自分の危険度はどうなのか、どんな治療があるのか、どんなことを工夫して生活したら良いのか、そして、遺伝による高コレステロール血症についても理解を深めていただきたいと思います。高LDLコレステロール血症を正しく理解し、適切な治療や自分にあった対処法を続けることによって、みなさんが健康な日々を過ごせるよう、この冊子をお届けします。

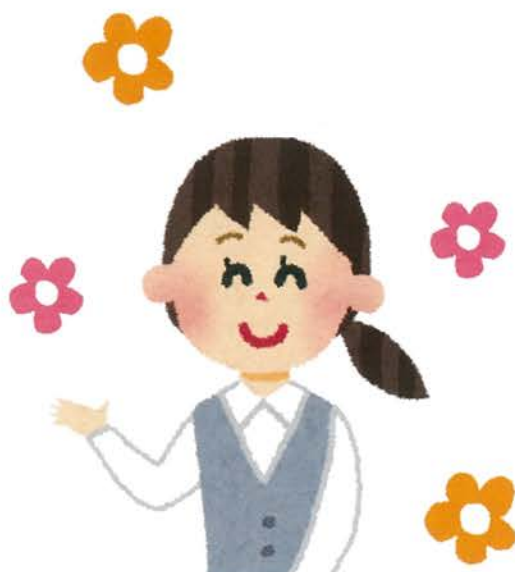

## 2. コレステロールについて

### コレステロールとは何でしょう

コレステロールとは本来、細胞膜や性ホルモン、脂肪の消化吸収に必要な胆汁酸の材料となり、体にとって必要なものです。

コレステロールの値を決める因子には、食事内容、ホルモン、年齢などいろいろなものがありますが、一番大きな影響を与えているのは体質です。

トリグリセライド(中性脂肪)は、主にエネルギー源として使われます。

コレステロールやトリグリセライドは“油”の性質があるため、水になじまず、それだけでは血液中に溶けることができません。そのため、アポ蛋白という蛋白質と一緒にあってリポ蛋白となり、肝臓から血液中へ分泌されます。

このリポ蛋白は比重と大きさによって、VLDL、LDL、HDLの3種類に分けられます(図3)。

LDLはコレステロールを肝臓から末梢細胞に運搬しています。

逆に、HDLはコレステロールを末梢細胞から肝臓へ運搬し、便中に排泄します。

図3 リポ蛋白の種類

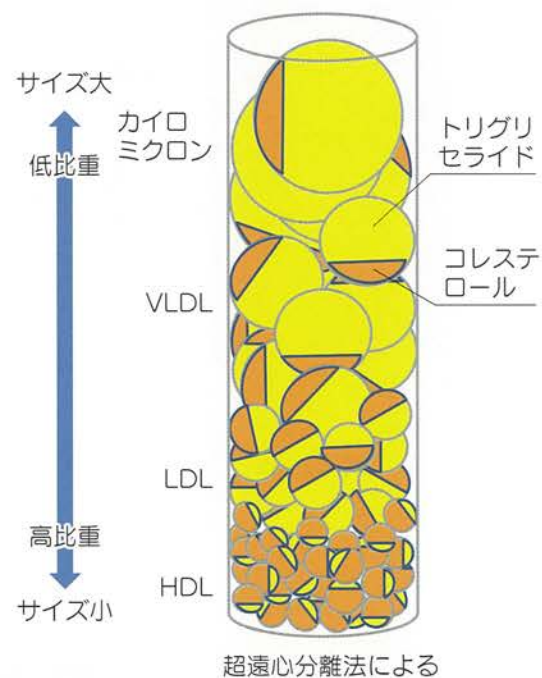



## 2. コレステロールについて

図4 HDL コレステロールと  
LDL コレステロールの割合  
(正常人)

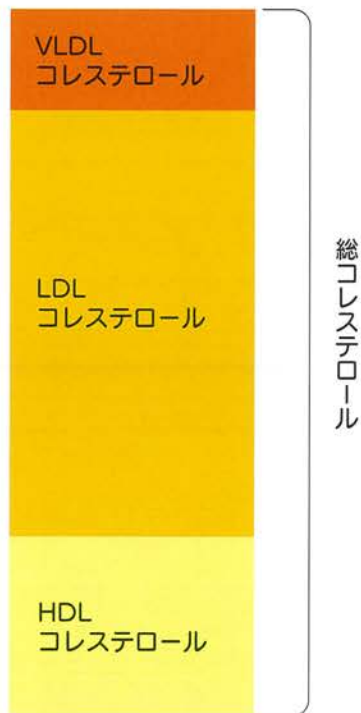

これまでの研究から、LDLに含まれるコレステロールが高いと動脈硬化が進みやすく、逆にHDLに含まれるコレステロールが高いと動脈硬化が進みにくいことが分かっています。そのため、LDLコレステロールは「悪玉コレステロール」、HDLコレステロールは「善玉コレステロール」といいます。

正常な人では、血液中のコレステロールの約3分の2がLDLにふくまれます(図4)。ほとんどの高コレステロール血症の場合、このLDLコレステロールが多いため、動脈硬化が進みやすいのです。

LDLコレステロール(悪玉)140mg/dℓ以上を高LDLコレステロール血症、HDLコレステロール(善玉)は40mg/dℓ未満が低HDLコレステロール血症となります(図5)。

図5 脂質異常症の診断基準

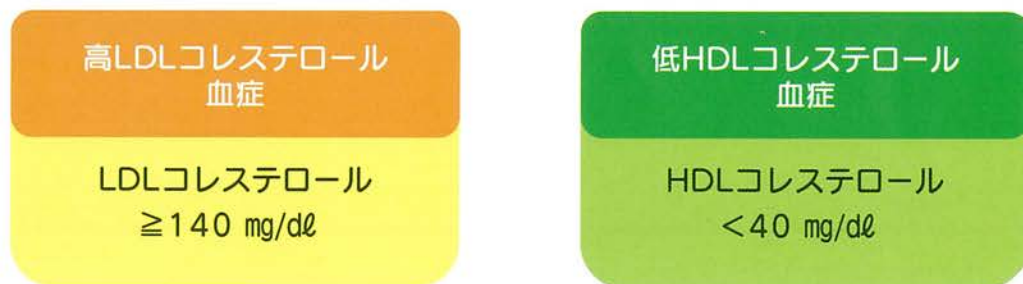

### 3. コレステロールが高いとなぜよくないのでしょうか

#### 高コレステロール血症と動脈硬化

高コレステロール血症が長年続くと動脈硬化が起こってきます。

動脈硬化とは、動脈壁にコレステロールが沈着したり、動脈壁の細胞が増加したりして、血管の内腔が狭くなり、結果的には、血液の流れを悪くし、心臓や脳の働きを悪くしてしまう病気です。

長い間に水道管に水垢がたまるようなものです。

#### 動脈硬化はどのように起こるのでしょうか

動脈壁の最も内側にある内皮細胞を通して、血液中のLDLコレステロールが血管壁へ進入します。本来、内皮細胞は血液側からの進入を防ぐ防波堤の役割を果たしているのですが、高コレステロール血症、高血圧、喫煙などが、これらの内皮細胞を損傷し、細胞の脱落を引き起こし、コレステロールを侵入しやすくします。

その結果、血管壁の内膜や中膜にある平滑筋細胞が増殖しはじめ、次第に血管内腔が狭くなり、血液の流れを悪くします(図6)。

動脈硬化は全身の血管に起こりますが、特に冠動脈と脳動脈・大動脈が目立ちます。

次に、心臓に栄養や酸素を送る血管である冠動脈について説明します。

図6 動脈硬化の進み方

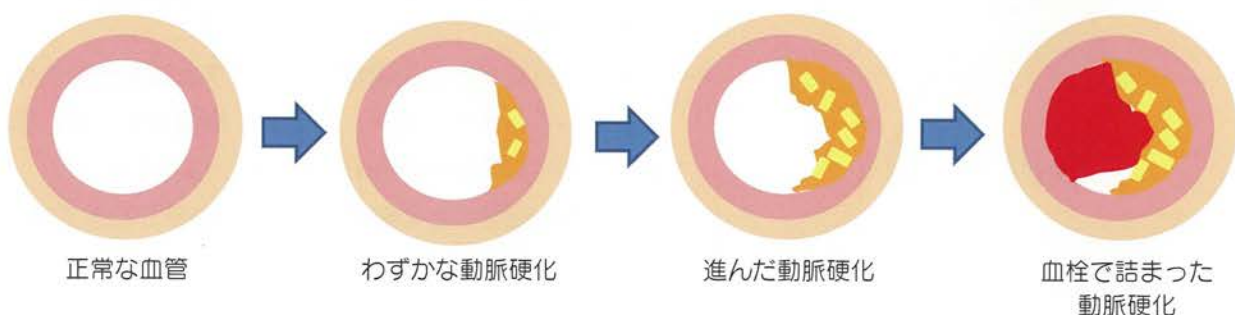

### 3. コレステロールが高いとなぜよくないのでしょうか

図7 心臓を走る3本の冠動脈

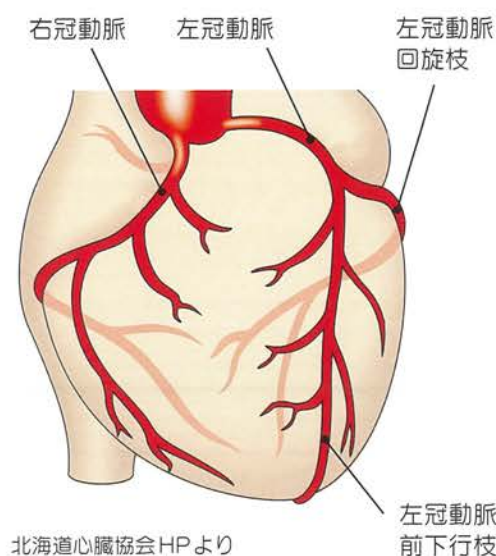

#### 心臓と冠動脈

心臓は全身に血液を送り出すポンプの役割を果たしています。心臓は筋肉(心筋)からできていて、その筋肉が伸びたり縮んだりすることによって、左心室から全身に血液が送り出されます。こうした大切な役割を担っている心臓の筋肉に、酸素や栄養を運んでいる血管が冠動脈です。心臓の表面には冠動脈が3本走っています(図7)。

#### 狭心症や心筋梗塞

狭心症とは、冠動脈の内腔が狭くなり血液が流れにくくなった状態です。階段を上るときや走ったとき“胸がしめつけられる、圧迫されるような”症状が数分続きます。冠動脈内腔がより狭くなったり、コレステロールがたくさん蓄積した動脈硬化病変では血液が固まりやすく、血栓で血管がつまってしまいます。

心臓の筋肉への血液の流れが止まってしまい、心臓の一部が機能しなくなった状態を心筋梗塞といいます。心筋梗塞では、より強い胸の痛みが起こり、突然死することさえあります。

動脈硬化を悪化させる第1の原因は高コレステロール血症です。心疾患は年齢と共に発症しやすいですが、男性は女性よりも約10年早く発症します。

#### その他の動脈硬化症

冠動脈以外の動脈硬化症には大動脈硬化症があります。大動脈硬化症が悪化すると大動脈瘤となり、とくに腹部大動脈瘤が大きくなると破裂することもあり大変危険です。

下肢へ行く血管が動脈硬化を起こすと閉塞性動脈硬化症となり、下肢の痛み、しびれ、壊疽が起こり、血管のバイパス手術や足の切断も必要となります。

頸動脈や脳動脈も動脈硬化を起こしやすい血管です。

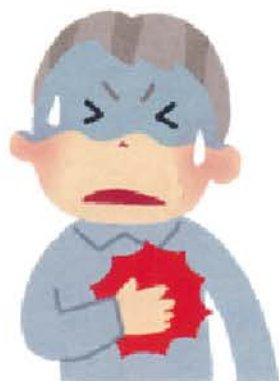

## 高LDLコレステロール血症の管理目標

一人ひとりの動脈硬化性疾患を発症する確率は危険因子の数によって異なります(図8)。  
LDLコレステロールの管理目標値としては、カテゴリー I は160mg/dℓ未満、カテゴリー II は140mg/dℓ未満、カテゴリー III は120mg/dℓ未満、二次予防は100mg/dℓ未満です(表3)。

図8 LDL コレステロール管理目標設定のためのフローチャート

参考：動脈硬化性疾患予防ガイドライン2012

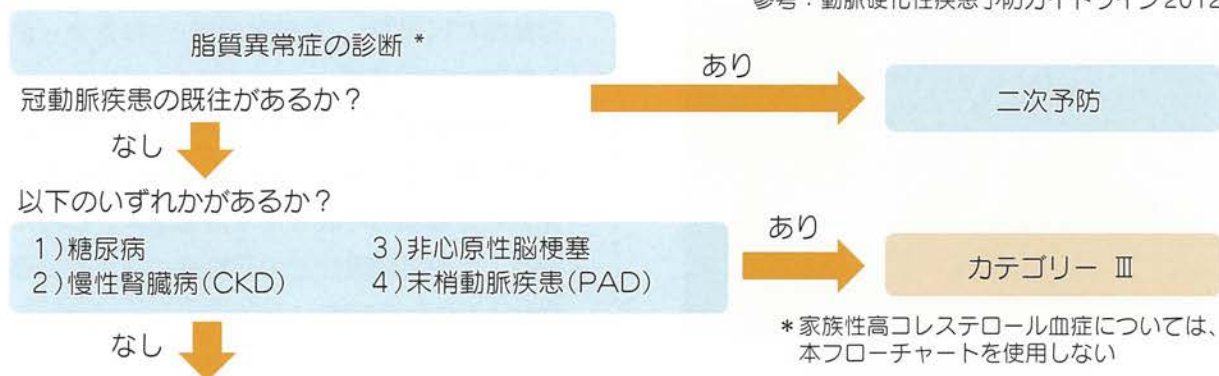

冠動脈疾患の一次予防のための絶対リスクに基づく管理区分

| NIPPON DATA80による10年間の冠動脈疾患による死亡確率(絶対リスク) | 追加リスクの有無  |                                                                                                      |
|------------------------------------------|-----------|------------------------------------------------------------------------------------------------------|
|                                          | 追加リスクなし   | 以下のいずれかあり<br>1) 低HDL-C血症(HDL < 40mg/dℓ)<br>2) 早発性冠動脈疾患家族歴<br>(第1度近親者 かつ 男性55歳未満、女性65歳未満)<br>3) 耐糖能異常 |
| 0.5%未満                                   | カテゴリー I   | カテゴリー II                                                                                             |
| 0.5%以上 2.0%未満                            | カテゴリー II  | カテゴリー III                                                                                            |
| 2.0%以上                                   | カテゴリー III | カテゴリー III                                                                                            |

表3 リスク区分別管理目標値

参考：動脈硬化性疾患予防ガイドライン2012

| 治療方針の原則                             | 管理区分      | LDLコレステロール管理目標値(mg/dℓ) |
|-------------------------------------|-----------|------------------------|
| 一次予防<br>まず生活習慣の改善を行った後、薬物療法の適用を考慮する | カテゴリー I   | < 160                  |
|                                     | カテゴリー II  | < 140                  |
|                                     | カテゴリー III | < 120                  |
| 二次予防<br>生活習慣の是正とともに薬物療法を考慮する        | 冠動脈疾患の既往  | < 100                  |

## 4. どんな検査があるのでしょうか

図9 冠動脈CT 血管造影  
(動脈硬化のない冠動脈)

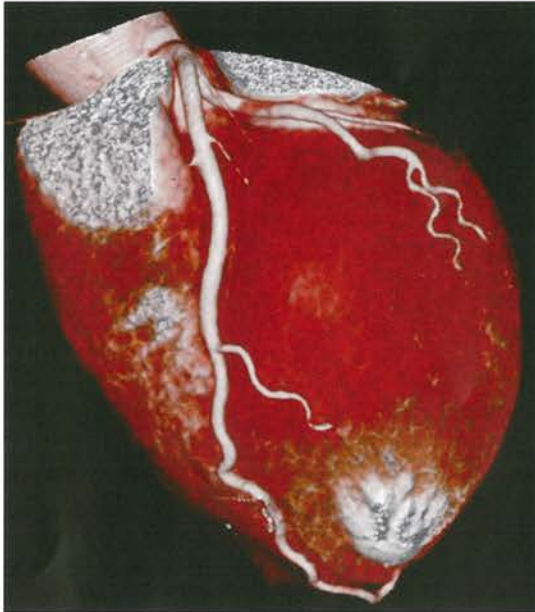

冠動脈CT (VR 画像)

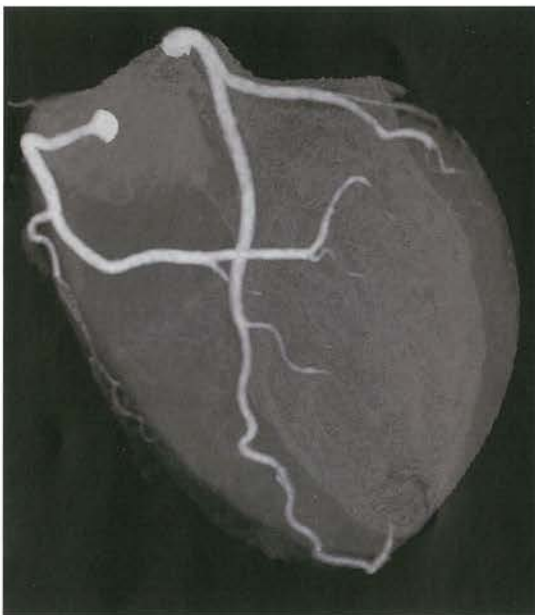

冠動脈CT (MIP 画像)

高コレステロール血症の人の中には、前胸部痛や動悸といった心臓に関係した症状がなくても、精密検査をしてみると冠動脈硬化のあることがあります。

狭心症や心筋梗塞が起こる前に冠動脈硬化を発見し早期治療を開始することは、非常に大切なことです。

そのためには、心電図検査、頸動脈エコー、冠動脈CT(図9)、冠動脈造影(心臓カテーテル検査)があります。

冠動脈造影は、細いチューブを足や腕の血管を通して心臓に入れ、そこから造影剤を注入し、冠動脈を映し出す方法です。この方法で、どの冠動脈がどの程度細くなっているかがよく分かります。

検査の結果、冠動脈の狭窄が進行している場合、バルーン(風船)やステントなどで血管を広げる治療や冠動脈のバイパス手術なども必要になります。

このような治療を受けた後も、コレステロール低下療法は続けなければなりません。そうしないと、血管が再び狭くなる可能性があるからです。

## 5. 高 LDL コレステロール血症の治療

### 食事療法

#### 1) カロリーを制限して、標準体重を目指そう

食事療法の基本はカロリーを摂り過ぎないようにすることです。適正なカロリーを摂取するには、まず自分にとっての適正なカロリー＝エネルギー量を知る必要があります。

$$\text{標準体重 (kg)} = \text{身長 (m)} \times \text{身長 (m)} \times 22$$

標準体重を目指すには、1日に摂る食事の総量を制限することが必要です。具体的には標準体重1kg当たり、25～30kcalに調節するのが理想的です。栄養バランスの偏りは、肥満を招き、血液中の脂質のバランスを乱します。1日3食バランスの良い食生活が大切です。

#### 2) コレステロールのとりすぎには注意

高LDLコレステロール血症の人の1日分のコレステロール摂取量は200mg以下が望ましいとされています。

#### 【コレステロールが多い食品】

鶏卵、うずら、バター、チーズ、クリーム、しらす干し、うなぎ、すじこ、たらこ、いか、うに、あまえび、牛レバー など

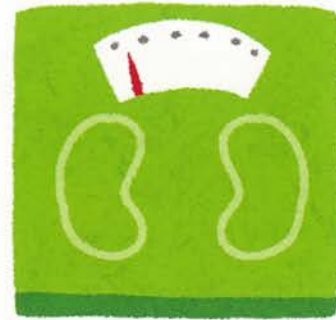

卵M1 個(50g) :  
コレステロール210mg

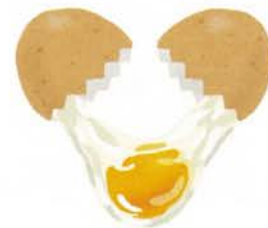

バター 100 g :  
コレステロール210mg

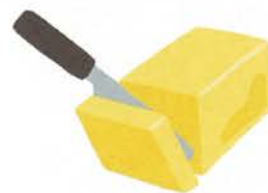

## 5. 高 LDL コレステロール血症の治療

図 10 1 日の野菜摂取量 350 g

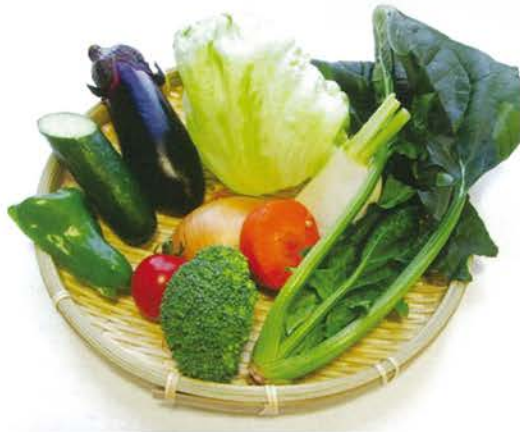

## 3) 食物繊維をたくさん食べましょう

野菜やきのこ、海草、豆類などに含まれる食物繊維にはコレステロールを下げる作用があります。消化管のコレステロールと結びつき、大便として排泄されることによってコレステロールを減らします。

特に食事の最初に食べると、後から食べたコレステロールを体外に排出したり、炭水化物の吸収をゆっくりにしてくれます。野菜は1日に350g以上摂りましょう(図10)。

果物やいも類にも食物繊維は多く含まれていますが、糖質が多いため、1日の基準(80kcal)を目安に食べましょう(図11・12)。

図 11 いも類 80kcal ( )は食物繊維量 g

| 25 g                                                                                | 60 g                                                                                | 110 g                                                                               | 120 g                                                                                 | 140 g                                                                                 |
|-------------------------------------------------------------------------------------|-------------------------------------------------------------------------------------|-------------------------------------------------------------------------------------|---------------------------------------------------------------------------------------|---------------------------------------------------------------------------------------|
| 干し芋(1.5g)                                                                           | さつまい(1.4g)                                                                          | じゃが芋(1.4g)                                                                          | 長芋(1.2g)                                                                              | 里芋(3.2g)                                                                              |
|  |  |  |  |  |

図 12 果物 80kcal ( )は食物繊維量 g

| 30g                                                                                 | 100g                                                                                | 150g                                                                                | 200g                                                                                | 250g                                                                                 |                                                                                       |                                                                                       |
|-------------------------------------------------------------------------------------|-------------------------------------------------------------------------------------|-------------------------------------------------------------------------------------|-------------------------------------------------------------------------------------|--------------------------------------------------------------------------------------|---------------------------------------------------------------------------------------|---------------------------------------------------------------------------------------|
| 干し柿<br>30g(4.2g)                                                                    | バナナ皮付<br>170g(1.1g)                                                                 | ぶどう<br>(デラウエア)<br>皮付<br>180g(0.8g)                                                  | ぶどう(巨峰)<br>(10~15粒)                                                                 | みかん皮付<br>270g<br>早生(1.4g)<br>普通(2.0g)                                                | なし皮付<br>240g(1.8g)                                                                    | いちご<br>(3.5g)                                                                         |
|  |  |  |  |  |  |  |
|                                                                                     |                                                                                     | 甘柿皮付<br>170g(2.4g)                                                                  | りんご皮付<br>180g(2.3g)                                                                 | もも皮付<br>240g(2.6g)                                                                   | すいか皮付<br>330g(0.6g)                                                                   |                                                                                       |
|                                                                                     |                                                                                     |  |  |  |  |                                                                                       |

#### 4) アルコールは飲みすぎに注意

アルコールは日本酒なら1合、ビールなら1本、ウイスキーならダブル1杯が適量です。

アルコール類には善玉のHDLコレステロールを増やす効果もありますが、飲み過ぎると肝硬変など、他の病気になりかねませんから、注意してください。

#### 運動療法

運動すると、HDLコレステロールが増えて中性脂肪が減少し、血液中の脂質バランスをよくすることができます。

とくにウォーキングのような有酸素運動は、エネルギー代謝を活発にするのでおすすめです。

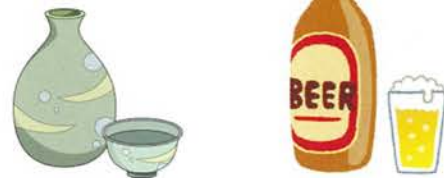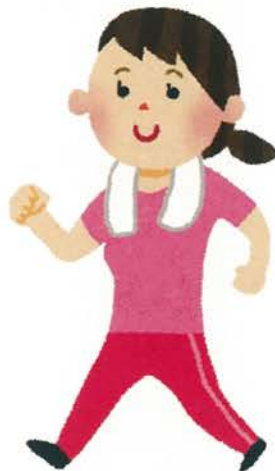



## 5. 高 LDL コレステロール血症の治療

### 薬物療法

食事療法だけでは効果が不十分な場合、薬物療法が必要です。

体内でのコレステロール合成を抑える薬(HMG-CoA還元酵素阻害薬(スタチン))は安定したコレステロールの低下作用が認められており、世界で最もよく使われています。

スタチンは血液中からLDLコレステロールを取り込むLDL受容体を増やすため、血液中のLDLコレステロールが下がります。

薬は非常に効果的ですが、やめればコレステロール値は元に戻ってしまいます。主治医の指導の下に服薬を継続し、血液検査、心電図検査などを定期的に受けることが必要です。

コレステロールが下がれば、動脈硬化の進行を止めることはもちろん、わずかですが元に戻せることが分かってきました。血管からコレステロールが抜けると動脈硬化病変は安定化し、血栓ができなくなり、狭心症や心筋梗塞は大幅に減少することが実証されています。こうした効果は2年くらいで現れてきますが、治療はさらに長時間続けることが必要です。

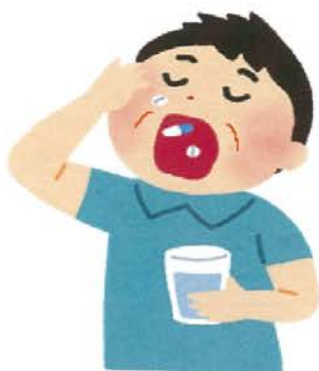

## 6. 家族性高コレステロール血症とは？

### 家族性高コレステロール血症

家族性高コレステロール血症 (Familial hypercholesterolemia FHと略します) は、生まれつき血液中のLDLコレステロールが異常に増える病気です。LDLコレステロールは肝臓の細胞表面にあるLDL受容体と呼ばれる蛋白によって細胞の中に取り込まれ、壊されます。家族性高コレステロール血症はLDL受容体の遺伝子やこれを働かせる遺伝子に異常があり、血液中のLDLコレステロールが細胞に取り込まれないで、血液の中に溜まってしまう病気です。

コレステロールが高くなる遺伝子を両親のどちらか一方から遺伝した場合はヘテロ接合体といい、両親両方から受け継いだ場合はホモ接合体とよびます (図 13)。症状はホモ接合体の方が重く、適切に治療がなされないと幼い頃から動脈硬化が進行して、小児期に心筋梗塞など命に関わる病気を発症することがあります。

### 家族性高コレステロール血症の人はどのくらいいるのでしょうか

家族性高コレステロール血症は、200人に1人以上いると推定され、全国では60万人以上いると考えられますが、実際はそのうち10～20%しか適切に診断され、治療されていないとされています。

図 13 家族性高コレステロール血症の家系図

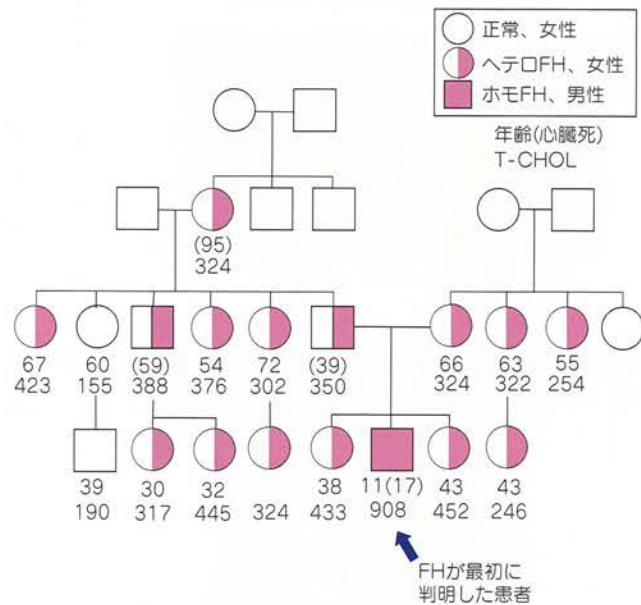

図 14 正常者、ヘテロFH、ホモFH 患者の血清コレステロール値の分布

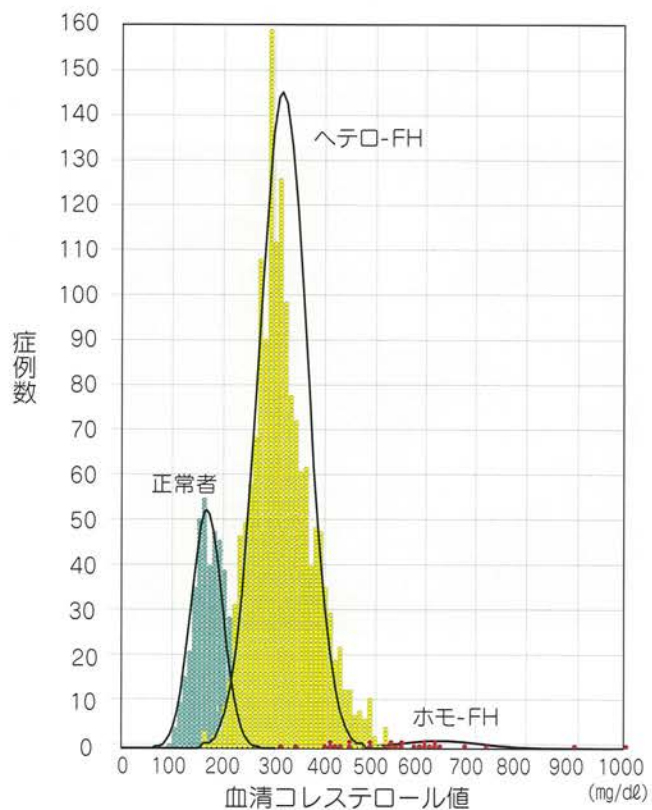

## 6. 家族性高コレステロール血症とは？

図 15 ホモ接合体性家族性高コレステロール血症患者の身体所見

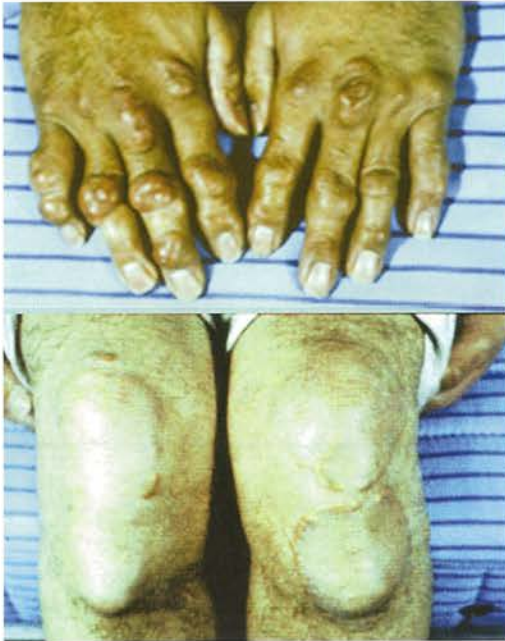

図 16 ヘテロ接合体性家族性高コレステロール血症患者の身体所見

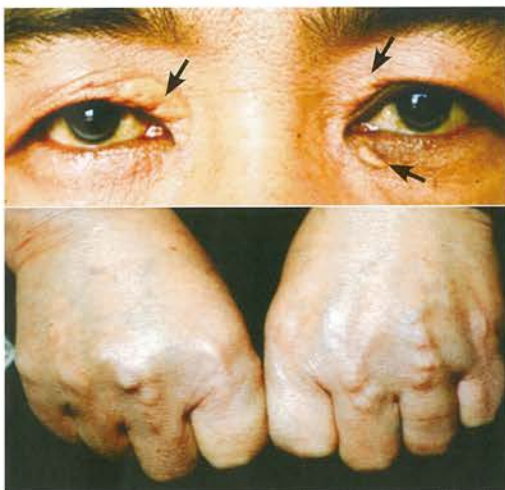

### どのような症状が起こるのでしょうか

家族性高コレステロール血症の人の総コレステロール値は、ヘテロ接合体で平均  $330 \pm 60 \text{ mg/dL}$ 、ホモ接合体では  $669 \pm 104 \text{ mg/dL}$  で、一般人 ( $179 \pm 26 \text{ mg/dL}$ ) に比べるとそれぞれ約 2 倍、4 倍にもなります (図 14)。

このため、家族性高コレステロール血症の人の場合、一般人よりもずっと若くして動脈硬化が進み、虚血性心疾患 (狭心症、心筋梗塞、突然心臓死など) を起こす危険性があります。

男性では 20 歳代より心電図異常が現れ、30 歳代でその頻度は急増し、平均 58 歳で心筋梗塞を起こしています。女性の場合は男性よりやや遅れて、平均 69 歳で心筋梗塞を起こしていることが分かっています。

家族にも同じ高コレステロール血症が発症しますので、家族ぐるみで検査、治療、管理が必要です。

また、高コレステロール血症が長い間続くと、冠動脈以外にもコレステロールが沈着します。眼瞼 (まぶた)、ひじ、ひざ、おしりなどの皮膚、手の甲やアキレス腱にコレステロールが沈着したものを黄色腫 (おうしょくしゅ) と言います。なかでも、手の甲とアキレス腱の黄色腫は、家族性高コレステロール血症に特有な所見です (図 15・16)。

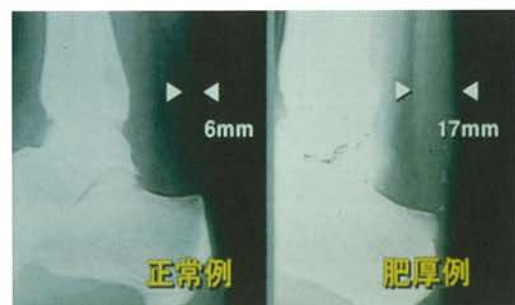

アキレス腱の X 線写真 (正常例に比べ、FH ではアキレス腱が肥厚している)

## 治療法

家族性高コレステロール血症であっても、喫煙や高血圧、糖尿病など動脈硬化を進行させる危険因子の管理や、適切な食生活は大切です。しかし厳密に食事制限をしてもコレステロールの低下はわずかです。家族性高コレステロール血症においては、虚血性心疾患の発症を抑えるために強力なコレステロール低下療法が重要です。体内でのコレステロール合成を抑える薬(スタチン)は非常に効果的な薬であり、きちんと服用することが大切です。

より重症度が高いホモ接合体の場合には、薬物療法のみでは効果が期待できないため、LDLアフェレーシス療法と呼ばれる治療が必要になることがあります。これは、機械装置を使って血液からLDLコレステロールを直接除去する方法です。

薬物療法やLDLアフェレーシス療法でも十分な効果が期待できない例では、肝臓移植の適応となります。

家族性高コレステロール血症は心筋梗塞など重大な病気を引き起こしますが、適切に治療すれば改善が期待できます。

LDLコレステロールが高い人は放っておかず、主治医に相談して適切な検査、治療を受けましょう。

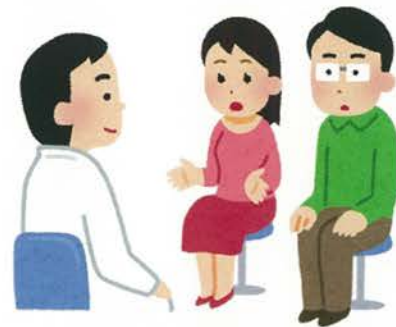

## 7. さいごに

自分の健康を守るためには、まずはからだの状態を知ることが必要です。年に1度は健康診査を受診し、結果を健康管理に役立てましょう。

金沢市では、みなさんの健康づくりを応援するため、健康相談を行っていますので、お気軽にご相談ください。

1  
2  
3  
4  
5  
6  
7  
8  
9  
10  
11  
12  
13  
14  
15  
16  
17  
18  
19  
20  
21  
22  
23  
24  
25  
26  
27  
28  
29  
30  
31  
32  
33  
34  
35  
36  
37  
38  
39  
40  
41  
42  
43  
44  
45  
46  
47  
48  
49  
50  
51  
52  
53  
54  
55  
56  
57  
58  
59  
60

**【発行】**

金沢市健康政策課

泉野福祉健康センター（泉野町6-15-5）

TEL：076-242-1131

元町福祉健康センター（元町1-12-12）

TEL：076-251-0200

駅西福祉健康センター（西念3-4-25）

TEL：076-234-5103

2016年1月作成

### 患者満足度アンケート簡易版 (PSQ-18)

次に挙げる質問は、あなたが受けた医療を  
あなた自身がどのように感じているかを評価するものです。

以下のページには、医療に関して一般に患者様が抱く感情・意見を列挙しています。一つ一つの項目を丁寧に読み、現在あなたが受けている医療に照らし合わせてみてください。私たちは、現在あなたが受けている医療を“良い”と感じているのか、あるいは“不十分だ”と感じているのかについて、伺いたいと思います。

以下に挙げるそれぞれの感情・意見について、あなたはどれほど同意、あるいは反対ですか？

(1つの質問に対して、1つの番号のみに丸をつけてください)

|                                       | 強く同意 | 同意 | よくわからない | 反対 | 強く反対 |
|---------------------------------------|------|----|---------|----|------|
| 1. 主治医からは、検査が必要な理由についてきちんと説明を受けている。   | 1    | 2  | 3       | 4  | 5    |
| 2. 主治医の診察室には、必要十分な医療を提供するための全てが揃っている。 | 1    | 2  | 3       | 4  | 5    |
| 3. 私が受けている医療は非の打ち所がない。                | 1    | 2  | 3       | 4  | 5    |
| 4. しばしば、主治医の診断が正しいのかしらと思うことがある。       | 1    | 2  | 3       | 4  | 5    |
| 5. 金銭的に過剰な負担なく必要な医療が受けられていると確信している。   | 1    | 2  | 3       | 4  | 5    |
| 6. 診察や医療を受ける際、主治医はくまなく丁寧に私を診察してくれる。   | 1    | 2  | 3       | 4  | 5    |
| 7. 私は、今以上にお金を自分の医療に支払わなくてはならないと感じている。 | 1    | 2  | 3       | 4  | 5    |
| 8. 私は、専門医あるいは医療の専門家への受診・相談が簡単にできる。    | 1    | 2  | 3       | 4  | 5    |

以下に挙げるそれぞれの感情・意見について、あなたはどれほど同意、あるいは反対ですか？

(1つの質問に対して、1つの番号のみに丸をつけてください)

|                                             | 強く同意 | 同意 | よくわからない | 反対 | 強く反対 |
|---------------------------------------------|------|----|---------|----|------|
| 9. 私の主治医の外来は、緊急治療が重なると長時間待たされる。             | 1    | 2  | 3       | 4  | 5    |
| 10. 主治医は、私に対して事務的で冷たすぎる。                    | 1    | 2  | 3       | 4  | 5    |
| 11. 私の主治医は、とても信頼できて、かつ礼儀正しい。                | 1    | 2  | 3       | 4  | 5    |
| 12. 主治医が、しばしば私の診察を急いで終わらせようとしているのではないかと感じる。 | 1    | 2  | 3       | 4  | 5    |
| 13. 主治医はしばしば私が言ったことを無視する。                   | 1    | 2  | 3       | 4  | 5    |
| 14. 主治医の診療の能力に疑問がある。                        | 1    | 2  | 3       | 4  | 5    |
| 15. 主治医は、私に多くの時間を割いてくれる。                    | 1    | 2  | 3       | 4  | 5    |
| 16. すぐに診察の予約を取るのが大変である。                     | 1    | 2  | 3       | 4  | 5    |
| 17. 現在私が受けている医療に満足していない。                    | 1    | 2  | 3       | 4  | 5    |
| 18. 私は、自分が望む医療をいつでも受けることができる。               | 1    | 2  | 3       | 4  | 5    |

# BMJ Open

## Impact of Genetic Testing on Low-density Lipoprotein Cholesterol in Patients with Familial Hypercholesterolemia (GenTLe-FH): A Randomised Waiting List Controlled Open-label Study Protocol

|                                 |                                                                                                                                                                                                                                                                                                                                                                                                                                                                                                                                                                                                                                                                                                                                                                                                                 |
|---------------------------------|-----------------------------------------------------------------------------------------------------------------------------------------------------------------------------------------------------------------------------------------------------------------------------------------------------------------------------------------------------------------------------------------------------------------------------------------------------------------------------------------------------------------------------------------------------------------------------------------------------------------------------------------------------------------------------------------------------------------------------------------------------------------------------------------------------------------|
| Journal:                        | <i>BMJ Open</i>                                                                                                                                                                                                                                                                                                                                                                                                                                                                                                                                                                                                                                                                                                                                                                                                 |
| Manuscript ID                   | bmjopen-2018-023636.R1                                                                                                                                                                                                                                                                                                                                                                                                                                                                                                                                                                                                                                                                                                                                                                                          |
| Article Type:                   | Protocol                                                                                                                                                                                                                                                                                                                                                                                                                                                                                                                                                                                                                                                                                                                                                                                                        |
| Date Submitted by the Author:   | 25-Oct-2018                                                                                                                                                                                                                                                                                                                                                                                                                                                                                                                                                                                                                                                                                                                                                                                                     |
| Complete List of Authors:       | Nomura, Akihiro; Kanazawa University Graduate School of Medicine, Department of Cardiovascular and Internal Medicine<br>Tada, Hayato; Kanazawa University Graduate School of Medicine, Department of Cardiovascular and Internal Medicine<br>Okada, Hirofumi; Kanazawa University Graduate School of Medicine, Department of Cardiovascular and Internal Medicine<br>Nohara, Atsushi; Kanazawa University Graduate School of Medical Sciences, Medical Education Research Center<br>Ishikawa, Hideki; Kyoto Prefectural University of Medicine, Department of Molecular-Targeting Cancer Prevention<br>Yoshimura, Kenichi; Kanazawa University, Innovative Clinical Research Center<br>Kawashiri, Masa-aki; Kanazawa University Graduate School of Medicine, Department of Cardiovascular and Internal Medicine |
| <b>Primary Subject Heading</b>: | Cardiovascular medicine                                                                                                                                                                                                                                                                                                                                                                                                                                                                                                                                                                                                                                                                                                                                                                                         |
| Secondary Subject Heading:      | Genetics and genomics                                                                                                                                                                                                                                                                                                                                                                                                                                                                                                                                                                                                                                                                                                                                                                                           |
| Keywords:                       | Familial hypercholesterolemia, genetic testing, genetic counseling, cardiovascular risk                                                                                                                                                                                                                                                                                                                                                                                                                                                                                                                                                                                                                                                                                                                         |
|                                 |                                                                                                                                                                                                                                                                                                                                                                                                                                                                                                                                                                                                                                                                                                                                                                                                                 |

SCHOLARONE™  
Manuscripts



1  
2  
3  
4  
5  
6  
7  
8  
9  
10  
11  
12  
13  
14  
15  
16  
17  
18  
19  
20  
21  
22  
23  
24  
25  
26  
27  
28  
29  
30  
31  
32

# 1 Impact of Genetic Testing on Low-density Lipoprotein Cholesterol in 2 Patients with Familial Hypercholesterolemia (GenTLe-FH): A Randomised 3 Waiting List Controlled Open-label Study Protocol 4

5  
6 Akihiro Nomura<sup>1,2</sup>, Hayato Tada<sup>1</sup>, Hirofumi Okada<sup>1</sup>, Atsushi Nohara<sup>1</sup>, Hideki Ishikawa<sup>3</sup>,  
7 Kenichi Yoshimura<sup>2</sup>, Masa-aki Kawashiri<sup>1</sup>  
8

9 <sup>1</sup>Department of Cardiovascular and Internal Medicine, Kanazawa University Graduate  
10 School of Medicine, Japan

11 <sup>2</sup>Innovative Clinical Research Center, Kanazawa University (iCREK), Japan

12 <sup>3</sup>Department of Molecular-Targeting Cancer Prevention, Kyoto Prefectural University of  
13 Medicine, Japan  
14  
15  
16

17 **Corresponding author:** Hayato Tada, MD, PhD  
18 Department of Cardiovascular and Internal Medicine  
19 Kanazawa University Graduate School of Medicine  
20 13-1 Takara-machi, Kanazawa, Ishikawa, 920-8641 Japan  
21 Phone number: +81-76-265-2259  
22 E-mail: ht240z@sa3.so-net.ne.jp  
23  
24  
25  
26

27  
28  
29  
30  
31  
32  
33  
34  
35  
36  
37  
38  
39  
40  
41  
42  
43  
44  
45  
46  
47  
48 **Word count:** 2,466 words  
49  
50  
51  
52  
53  
54  
55  
56  
57  
58  
59  
60

## 1 ABSTRACT

2 **Introduction:** Familial hypercholesterolemia (FH) is an autosomal dominant inherited  
3 genetic disease. High-throughput sequencing quickly and comprehensively detects causative  
4 variants of FH-related genes (*LDLR*, *PCSK9*, *APOB*, and *LDLRAP1*). Although the presence  
5 of causative variants in FH-related genes correlates with future cardiovascular events, it  
6 remains unclear whether detection of causative gene mutation and disclosure of its associated  
7 cardiovascular risk affects outcomes in patients with FH. Therefore, this study intends to  
8 evaluate the efficacy of counseling future cardiovascular risk based on genetic testing in  
9 addition to standard patients' education program in patients with FH.

10 **Methods and analysis:** A randomised, waiting-list controlled, open-label, single-center trial  
11 will be conducted. We will recruit patients with clinically diagnosed FH without previous  
12 history of coronary heart disease from March 2018 to December 2019, and we plan to follow-  
13 up participants until March 2021. For the intervention group, we will perform genetic  
14 counseling and will inform an estimated future cardiovascular risk based on individuals'  
15 genetic testing results. The primary endpoint of this study is the plasma low-density  
16 lipoprotein cholesterol level at 24 weeks after randomization. The secondary endpoints  
17 assessed at 24 and 48 weeks are as follows: blood test results; smoking status; changes of  
18 lipid-lowering agents' regimen; and Patients Satisfaction Questionnaire Short Form scores  
19 among the four groups divided by the presence of genetic counseling and genetic status of  
20 FH.

21 **Ethics and dissemination:** This study will be conducted in compliance with the Declaration  
22 of Helsinki, the Ethical Guidelines for Medical and Health Research Involving Human  
23 Subjects, and all other applicable laws and guidelines in Japan. This study protocol was  
24 approved by the IRB at Kanazawa University. We will disseminate the final results at  
25 international conferences and in a peer-reviewed journal.

1  
2  
3 1 **Trial registration:** This study was registered at the University Hospital Medical Information  
4  
5 2 Network (UMIN) Clinical Trials Registry (UMIN ID: UMIN000029375).  
6  
7  
8 3

9  
10 4 **Keywords:** Familial hypercholesterolemia, genetic testing, genetic counseling,  
11  
12 5 cardiovascular risk  
13  
14 6

15  
16  
17 7 **Strengths and limitations of this study:**  
18

- 19 8 • This would be the first randomised, waiting-list controlled study to assess whether  
20  
21 9 disclosing the risk for future cardiovascular diseases based on genetic testing results  
22  
23 10 correlates with reduced LDL cholesterol levels in patients with FH over standard FH  
24  
25 11 education.  
26  
27 12 • This study design is pragmatic, thus the study results could be applied for daily clinical  
28  
29 13 practice of primary prevention in patients with FH.  
30  
31 14 • For patients without causal variants in FH-related genes, disclosure of relatively low-risk  
32  
33 15 for future cardiovascular risk may inversely increase plasma LDL cholesterol levels  
34  
35 16 compared to high-risk individuals with causal variants in FH-related genes. This may  
36  
37 17 attenuate the intervention effect on the primary endpoint.  
38  
39  
40  
41  
42  
43  
44  
45  
46  
47  
48  
49  
50  
51  
52  
53  
54  
55  
56  
57  
58  
59  
60

## 1 INTRODUCTION

2 Familial hypercholesterolemia (FH) is an autosomal dominant inherited disorder, and the  
3 prevalence of patients with heterozygous FH in the general population is approximately 0.5-  
4 0.2% (1 in 200–500 individuals).<sup>1-5</sup> The major causative genes of FH are low-density  
5 lipoprotein (LDL) receptor (*LDLR*), proprotein convertase subtilisin/kexin type 9 (*PCSK9*),  
6 apolipoprotein B (*APOB*), and LDLR adaptor protein 1 (*LDLRAP1*). As FH is characterized  
7 by hyper LDL-cholesterolemia and systemic xanthomas from infancy, it is one of the leading  
8 causes of premature coronary artery disease.<sup>6</sup> Typically, patients with FH are prescribed  
9 lipid-lowering agents at an early stage to reduce plasma LDL cholesterol levels, which could  
10 prevent future occurrence of systemic arteriosclerosis including coronary artery disease.  
11 Hence, it is imperative to give a precise diagnosis of FH as early as possible.<sup>7</sup>

12 According to the Japanese Atherosclerosis Society guideline, the clinical diagnosis of  
13 FH in patients aged >15 years are made if the two of the following three criteria are met: (a)  
14 hyper LDL-cholesterolemia; (b) presence of tendon xanthomas; and (c) family history of FH  
15 or premature coronary artery disease.<sup>1</sup> Although genetic testing by the Sanger sequencing  
16 method is crucial for the definitive diagnosis of FH, it is performed only in some limited  
17 institutions because of its cost, large effort, and complexity. In addition, it remains unclear  
18 whether genetic testing offers some advantages on the diagnosis or outcomes in patients  
19 where FH has already been diagnosed clinically.

20 In recent years, advancements in comprehensive genetic analysis technology using a  
21 high-throughput sequencer (HTS) have facilitated checking variants in candidate genes cost-  
22 effectively and promptly. Previously, we conducted comprehensive genetic testing for  
23 patients clinically diagnosed with FH and suggested that the carriers of causative variants in  
24 FH-related genes (*LDLR*, *PCSK9*, *APOB*, or *LDLRAP1*) could be associated with future  
25 cardiovascular events.<sup>8</sup> In addition, the presence of causative variants in FH-related genes has

1  
2  
3 1 been reported to be associated with cardiovascular events, irrespective of LDL cholesterol  
4  
5 2 levels.<sup>9</sup> Based on these results, genetic testing could be useful from the perspective of  
6  
7 3 cardiovascular risk estimates and stratification of patients with FH. However, it remains  
8  
9 4 unclear whether genetic testing with informing future cardiovascular risk based on the results  
10  
11 5 affects the prognosis in patients with FH.  
12  
13

14 6 Thus, this study aims to evaluate whether informing genetically estimated future  
15  
16 7 cardiovascular risk based on genetic testing besides usual patient education correlates with  
17  
18 8 reduced LDL cholesterol levels in patients with FH.  
19  
20  
21  
22  
23

## 24 10 **METHODS AND ANALYSIS**

### 25 26 11 **Overall study design**

27  
28 12 This study is a randomised, waiting list controlled, open-label, single-center trial. For the  
29  
30 13 intervention group, we will perform genetic counseling as well as informing individual  
31  
32 14 genetically estimated future cardiovascular risk based on patients' genetic testing results.  
33  
34 15 Figure 1 shows the scheme of this study, and Table 1 outlines the overall follow-up schedule.  
35  
36 16 The primary outcome of this study is the plasma LDL cholesterol level at 24 weeks after  
37  
38 17 randomization. In addition, we hypothesize that the intervention group would have lower  
39  
40 18 LDL cholesterol levels compared with the control group at 24 weeks.  
41  
42  
43  
44  
45  
46  
47  
48  
49  
50  
51  
52  
53  
54  
55  
56  
57  
58  
59  
60

1 **Table 1 Assessment and evaluation schedule of this study**

2

|                                       | 12 Weeks before randomization                 | Day 0 (Week 0)               | Week 8<br>Week 16 | Week 24          | Week 32<br>Week 40   | Week 48   |
|---------------------------------------|-----------------------------------------------|------------------------------|-------------------|------------------|----------------------|-----------|
|                                       | Diagnosed with clinical FH (pre-registration) | Randomization (registration) | Main period       | Primary endpoint | Observational period | Trial end |
| <b>Informed consent</b>               | X                                             |                              |                   |                  |                      |           |
| <b>Patient background</b>             | X                                             |                              |                   |                  |                      |           |
| <b>Check adverse events</b>           | ←—————→                                       |                              |                   |                  |                      |           |
| Height                                | X                                             |                              |                   |                  |                      |           |
| Body weight                           | X                                             | X                            | X                 | X                | X                    | X         |
| BP/HR                                 | X                                             | X                            | X                 | X                | X                    | X         |
| Symptoms                              | X                                             | X                            | X                 | X                | X                    | X         |
| Physical examination                  | X                                             | X                            | X                 | X                | X                    | X         |
| <b>Blood tests</b>                    |                                               |                              |                   |                  |                      |           |
| Lipid profile                         | X                                             | X                            | X                 | X                | X                    | X         |
| FPG/HbA1c                             | X                                             | X                            | X                 | X                | X                    | X         |
| CBC                                   | X                                             | X                            | X                 | X                | X                    | X         |
| Chemistry                             | X                                             | X                            | X                 | X                | X                    | X         |
| Genetic testing                       | X                                             |                              |                   |                  |                      |           |
| <b>Lipid-lowering therapy regimen</b> | X                                             | X                            | X                 | X                | X                    | X         |
| <b>PSQ-18</b>                         | X                                             | X                            |                   | X                |                      | X         |
| <b>Smoking status</b>                 | X                                             | X                            | X                 | X                | X                    | X         |

3 Abbreviations: BP, blood pressure; CBC, complete blood counts; FH, familial

4 hypercholesterolemia; FPG, fasting plasma glucose; HR, heart rate; PSQ-18, the Patient

5 Satisfaction Questionnaire Short Form

6

1  
2  
3 1 This study will be conducted in compliance with the Declaration of Helsinki, the  
4  
5 2 Ethical Guidelines for Medical and Health Research Involving Human Subjects, and all other  
6  
7 3 applicable laws and guidelines in Japan. In addition, this study protocol (version 2.0 dated 27  
8  
9 4 Aug 2018) was approved by the Institutional Review Board (IRB) at Kanazawa University  
10  
11 5 Hospital (Kanazawa, Japan) and was registered at the University Hospital Medical  
12  
13 6 Information Network (UMIN) Clinical Trials Registry (UMIN ID: UMIN000029375).  
14  
15  
16  
17  
18

### 19 8 **Study participants**

20  
21 9 We will recruit patients with clinically diagnosed FH from March 2018 to December 2019,  
22  
23 10 and we plan to follow-up participants until March 2021. Of note, only participants fulfilling  
24  
25 11 all inclusion criteria will be enrolled in this study (Table 2), and those with either of the  
26  
27 12 exclusion criteria were excluded from this trial (Table 3). In addition, we will obtain written  
28  
29 13 informed consent from all trial participants and these forms were approved by the IRB at the  
30  
31 14 Kanazawa University Hospital (Supplemental Data 1). It will be mandatory for trial  
32  
33 15 participants to understand the contents of the consent form before giving their acceptance;  
34  
35 16 moreover, it will have to be dated and signed by both trial participants and investigators.  
36  
37 17 Upon obtaining consent, the first copy of the consent form will be kept in the hospital and the  
38  
39 18 other part was kept by the patient and will not collect after the completion of the trial.  
40  
41 19 Furthermore, all participants will be informed that their medical care will not be affected if  
42  
43 20 they refused to enroll in the trial and that they will be free to withdraw their consent at any  
44  
45 21 time of the study period, at their discretion.  
46  
47  
48  
49  
50  
51  
52  
53  
54  
55  
56  
57  
58  
59  
60

1  
2  
3 **1 Table 2 Inclusion criteria**  
4  
5  
6 2

---

7 We include the patients with all the following criteria:  
8

- 9  
10 4 1) Age  $\geq 15$  years  
11  
12 5 2) Diagnosed with familial hypercholesterolemia per the criteria of the Japan  
13  
14 6 Atherosclerosis Society  
15  
16 7 3) Patients who have never got genetic tests, or have not yet returned genetic  
17  
18 8 results regarding familial hypercholesterolemia  
19  
20 9 4) Patients who can provide written informed consent  
21  
22  
23
- 

24 10  
25  
26 **11 Table 3 Exclusion criteria**  
27  
28  
29 12

---

30 We exclude patients with either of the following criteria:  
31

- 32  
33 1) Liver dysfunction (AST or ALT  $> 3$  times the UNL)  
34  
35 2) Renal dysfunction (Cr,  $\geq 2.0$  mg/dL)  
36  
37 3) Immunosuppression  
38  
39 4) Active cancer  
40  
41 5) Previous history of coronary heart disease:  
42  
43 i) Myocardial infarction  
44  
45 ii) History of percutaneous coronary intervention or coronary artery bypass graft  
46  
47 iii) Coronary stenosis ( $\geq 75\%$ ) previously detected by coronary angiography  
48  
49  
50 6) Female with pregnancy or expected  
51  
52 7) Patients whose doctors in charge consider him/her inappropriate to participate  
53  
54  
55
- 

56 13 Abbreviations as Table 1  
57  
58  
59 14  
60



## 1 Screening FH causal variant

2 We will sequence exons of four FH-related genes (*LDLR*, *PCSK9*, *APOB*, and *LDLRAP1*)  
3 using the Illumina MiSeq system. The variant is defined as FH causal when it fulfills either of  
4 the following criteria: (a) registered as pathogenic/likely pathogenic in the ClinVar database;  
5 (b) minor allele frequency <1% in the East Asian population with (i) protein-truncating  
6 variants (nonsense, canonical splice sites, or frameshift), and (ii) missense variants that *in*  
7 *silico* damaging scores (SIFT, PolyPhen-2 HDIV, PolyPhen-2 HVAR, MutationTaster2,  
8 LRT), all predicted as pathogenic;<sup>9</sup> (c) missense variants reported as pathogenic in the  
9 Japanese population: *PCSK9* p.Val4Ile and p.Glu32Lys;<sup>10 11</sup> and (d) eXome-Hidden Markov  
10 Model (XHMM) software predicted as copy number variations (large duplication/large  
11 deletion).<sup>12</sup>

## 13 Intervention and control

14 Regarding the intervention group, we will perform genetic counseling besides standard FH  
15 patient education. In addition, a single qualified doctor will inform genetically estimated  
16 future cardiovascular risk based on the result of genetic testing. Genetic counseling will  
17 comprise the following: (a) genetic diagnosis; (b) outline of what FH is; (c) checking family  
18 history of hyperlipidemia/cardiovascular diseases; (d) informing that the results of genetic  
19 testing could facilitate the research in this field; and (e) explaining the physical/mental  
20 support system in our hospital. Of note, this counseling will be provided by a qualified  
21 physician of clinical genetics. In addition, we will inform odds ratios of future cardiovascular  
22 risk, based on the presence or absence of 1) a causal genetic variant and 2) a clinical sign  
23 (xanthomas and/or family history of FH) by using the original Japanese documents  
24 (Supplemental Data 2).<sup>8 9</sup> After counseling we will set time to answer the queries of patients  
25 adequately, confirming their level of understanding.

1  
2  
3 1 Regarding the control group, we will only disseminate standard FH patient education  
4  
5 2 using the Japanese booklet for FH patient education according to the FH management  
6  
7 3 guideline;<sup>1</sup> this education will be provided by a clinical cardiology physician specialist. After  
8  
9 4 the education, we will set time to answer the queries of patients adequately. After evaluating  
10  
11 5 primary endpoint (24<sup>th</sup> week from randomisation), the control group will receive their genetic  
12  
13 6 testing results and future cardiovascular risks via counseling as the intervention group  
14  
15 7 receives.

16  
17 8 Both groups will be followed-up until 48<sup>th</sup> weeks from randomisation. Furthermore, it  
18  
19 9 will be possible to receive additional counseling and/or outpatient visit when patients want or  
20  
21 10 are afraid of genetic testing regardless of the intervention or control groups during and after  
22  
23 11 the trial.  
24  
25  
26  
27  
28  
29  
30

### 31 **Outcomes**

32  
33 14 The primary endpoint of this study is the plasma LDL cholesterol levels at 24 weeks. In  
34  
35 15 addition, secondary endpoints assessed at 24 and 48 weeks are as follows: blood test results;  
36  
37 16 smoking status; changes of lipid-lowering agents' regimen; and Patients Satisfaction  
38  
39 17 Questionnaire Short Form (PSQ-18) scores between the intervention and control groups or  
40  
41 18 among the four groups taking genetic testing results (positive / negative) into consideration  
42  
43 19 ([1] intervention + positive; [2] intervention + negative; [3] control + positive; and [4] control  
44  
45 20 + negative).  
46  
47  
48  
49  
50

### 51 **Follow-up schedule**

52  
53 23 Table 1 lists the overall follow-up schedule for this study. Follow-up visits will be conducted  
54  
55 24 in an outpatient clinic at the Kanazawa University Hospital. We will check patients'  
56  
57 25 background profiles, height, body weight, blood pressure (BP), heart rate (HR),  
58  
59  
60

1 subjective/objective symptoms, complete blood counts, chemistry, lipid profile, Lp(a), fasting  
2 glucose, hemoglobin A1C, lipid-lowering agents' regimen, PSQ-18, smoking status, and  
3 genetic testing. In addition, data regarding patients' background profiles, including age, sex,  
4 and medical history, will be obtained. We expect to arrange regular follow-up visits at eight  
5 weeks ( $\pm 14$  days), 16 weeks ( $\pm 14$  days), 24 weeks ( $\pm 14$  days), 32 weeks ( $\pm 14$  days), 40  
6 weeks ( $\pm 14$  days), and 48 weeks ( $\pm 14$  days) to evaluate patients' body weight, BP/HR,  
7 symptoms, blood test results, prescription, adherence to prescribed medication by self-report,  
8 PSQ-18, and smoking status. Furthermore, we will evaluate the primary outcome at 24 weeks  
9 and recorded adverse events and concomitant medication throughout the trial.

10 Data monitoring will be conducted by an independent monitoring staff. The trial  
11 institution will be monitored after the first randomisation and every 6 months until the case  
12 report form of the last participant is obtained. Trial database will also be monitored and  
13 reviewed by the staff, and data queries will be raised if necessary.

### 15 **Sample size and power**

16 The plasma LDL cholesterol levels at 24 weeks are the primary endpoint of this study. Of  
17 note, the estimated difference in the LDL cholesterol level between the intervention and  
18 control groups was 15 mg/dL with a standard deviation of 25. In the sample size calculation,  
19 we determined that the required patients per group were 44 with 95% confidence interval and  
20 power of 80%. Moreover, we set the drop rate as 10%, and approximately 100 patients with  
21 FH were required for this trial.

### 23 **Randomization**

24 We will randomize patients with FH using an independent web-based randomization system  
25 that included a minimization algorithm balanced for age ( $\geq 50$  years and  $< 50$  years), gender

1 (male and female), and causative variant, positive or negative. This system automatically  
2 allocates patients' to either the intervention or control groups. Only principal investigator,  
3 trial physicians, and the clinical trial research coordinators have access to the clinical,  
4 laboratory and allocation data. Of note, researchers performing statistical analyses will be  
5 blinded to the allocation.

### 7 **Statistical analysis**

8 We will compare the outcomes between intervention and control groups. The baseline  
9 profiles are described by the mean and standard deviation, or median and quantiles  
10 (continuous variables), or proportion (categorical variables). In addition, we will assess the  
11 primary endpoint based on the intention-to-treat fashion, which was compared between the  
12 groups using the *t*-test. Moreover, we will compare secondary endpoints between the groups  
13 at each defined period using the *t*-test, Mann–Whitney *U*-test, Fisher's exact test, or linear or  
14 logistic regression adjusted by appropriate covariates. Finally,  $P < 0.05$  will be considered  
15 statistically significant for the primary endpoint. Statistical analysis will be performed using  
16 SAS version 9.3 (SAS Institute Inc., Cary, NC, USA) or R software version 3.4.1 or above  
17 (The R Project for Statistical Computing, Vienna, Austria).

### 19 **Patient and public involvement**

20 Patients and public will not be involved in the development of the research question and  
21 outcome measures; the design of this study; the assessment of the intervention in this study;  
22 or the recruitment to and conduct of the study. We will disseminate the final results to the  
23 study participants after the results are published in a peer-reviewed journal.

### 25 **DISCUSSION**

1  
2  
3 1 For this study to demonstrate the clinical efficacy of informing cardiovascular risk based on  
4  
5 2 genetic testing results, it is imperative not only to confirm the FH diagnosis by genetic testing  
6  
7 3 but also to provide thoughtful evidence that genetic testing-based cardiovascular risk  
8  
9 4 disclosure could enhance the prognosis of patients with FH. Furthermore, it might be possible  
10  
11 5 to further advance precision medicine based on causal gene variants currently proposed  
12  
13 6 mainly in the United States.<sup>13</sup>  
14  
15

16  
17 7 This study will enroll patients with FH without a history of coronary heart diseases  
18  
19 8 (CHD). Reportedly, patients with FH are at high risk of CHD compared with those without  
20  
21 9 FH.<sup>14</sup> In addition, patients with FH with causal variant positive in FH-related genes are  
22  
23 10 more likely to be diagnosed with CHD than those without a causal variant in FH-related  
24  
25 11 genes.<sup>8,9</sup> Thus, the target plasma LDL cholesterol level is <100 mg/dL for primary prevention  
26  
27 12 in patients with FH.<sup>1</sup> However, the achievement rate of target LDL cholesterol levels remains  
28  
29 13 around 20%, despite appropriate lipid-lowering drug prescription.<sup>15</sup> Beyond lipid-lowering  
30  
31 14 agents, encouraging behavioural changes by the disclosure of genetic testing results is the  
32  
33 15 focus of attention. In a recent randomized trial, Kullo et al. reported that the disclosure of  
34  
35 16 future CHD risk by evaluating the genetic risk score correlated with the declining LDL  
36  
37 17 cholesterol level at six months in patients with general hypercholesterolemia.<sup>16</sup> The results of  
38  
39 18 our study could prove that the risk stratification by genetic testing result and the disclosure of  
40  
41 19 future cardiovascular risk can promote patients' behavioural changes and can elucidate the  
42  
43 20 benefit of attaining the target of LDL cholesterol, and thus might further reduce plasma LDL  
44  
45 21 cholesterol levels.  
46  
47  
48  
49

50  
51 22 In this study, the primary endpoint is the changes in the plasma LDL cholesterol  
52  
53 23 levels following the disclosure of future CHD risk based on a genetic testing result.  
54  
55 24 Reportedly, LDL cholesterol is a primary risk factor for CHD, and lipid-lowering therapy and  
56  
57 25 a healthy lifestyle play a crucial role in reducing LDL cholesterol level.<sup>16,17</sup> We have already  
58  
59  
60

1 standardized assays previously to assess the lipid profile and we evaluated the LDL  
2 cholesterol level directly or by the Friedewald formula.<sup>18</sup> In addition, we will assess whether  
3 changes in LDL cholesterol are because of changes in the lipid-lowering therapy regimen,  
4 behaviour change, lifestyle modification, or a combination of them. Furthermore, we assessed  
5 patients' mental status such as satisfaction or anxiety to genetic testing, genetic counseling,  
6 disclosure of future CHD risk, a change in the treatment regimen, and doctor-patient  
7 relationship at outpatient clinic visits.

8         The strength of genetic testing is that we will not only be able to precisely inform the  
9 personalized genetic information and future CHD risk but will also be able to ameliorate  
10 participants' inner bad emotions for their diseases and decision makings over treatment. Thus  
11 we will check the PSQ-18 as one of the secondary endpoints to objectively assess patients'  
12 understanding and satisfaction for the daily medical practice, disclosure of genetic risk,  
13 treatment decisions, and medical costs. Lewis et al. reported that genetic counseling after  
14 standard education might improve the satisfaction of individuals who have received their  
15 carrier results.<sup>19</sup> Our study might provide interesting perspectives of returning genetic results  
16 with the disclosure of future CHD risk for patients with FH, who have reliable and evidence-  
17 based treatment options to prevent the risk.

18         In conclusion, we aimed to demonstrate the study design and protocol of the Impact  
19 of Genetic Testing on Low-density Lipoprotein Cholesterol in Patients with FH (GenTLe-  
20 FH) study. This study would be the first randomized controlled trial investigating the clinical  
21 efficacy of the disclosure of future CHD risk based on genetic testing results in patients with  
22 FH. We hypothesize that the intervention group has a lower plasma LDL cholesterol level  
23 than the control group at six months after randomization. Finally, this study will provide  
24 insights into the importance of genetic testing and its disclosure of cardiovascular risk in  
25 patients with FH.

1  
2  
3 1  
45 2 **ACKNOWLEDGEMENTS**  
67  
8 3 We express our gratitude to all the participants and staff in this study. We also thank Enago  
9  
10 4 (www.enago.jp) for English language editing.  
1112 5  
13  
14 6 **COMPETING INTERESTS STATEMENT**  
1516  
17 7 Authors have no conflict of interest to disclose.  
1819 8  
20  
21 9 **FUNDING STATEMENT**  
2223  
24 10 This study is supported by the Innovative Clinical Research Center Kanazawa University  
25  
26 11 (iCREK) Clinical Research Seed Grant.  
2728  
29  
30  
31 13 **AUTHORS' CONTRIBUTIONS**  
3233 14 A. Nomura, H. Tada, A. H. Okada, A. Nohara, and MA. Kawashiri designed and conducted  
34  
35 15 the study. K. Yoshimura and H. Ishikawa gave us critical comments on statistical methods.  
36  
37 16 All authors performed a critical review and approved the final version of the manuscript.  
38  
39  
40  
41  
42  
43  
44  
45  
46  
47  
48  
49  
50  
51  
52  
53  
54  
55  
56  
57  
58  
59  
60

## 1 REFERENCES

- 2 1. Harada-Shiba M, Arai H, Oikawa S, et al. Guidelines for the management of familial  
3 hypercholesterolemia. *J Atheroscler Thromb* 2012;19(12):1043-60.
- 4 2. Gidding SS, Champagne MA, de Ferranti SD, et al. The Agenda for Familial  
5 Hypercholesterolemia: A Scientific Statement From the American Heart Association.  
6 *Circulation* 2015;132(22):2167-92. doi: 10.1161/CIR.0000000000000297
- 7 3. Watts GF, Gidding S, Wierzbicki AS, et al. Integrated guidance on the care of familial  
8 hypercholesterolaemia from the International FH Foundation. *Int J Cardiol*  
9 2014;171(3):309-25. doi: 10.1016/j.ijcard.2013.11.025
- 10 4. Nordestgaard BG, Chapman MJ, Humphries SE, et al. Familial hypercholesterolaemia is  
11 underdiagnosed and undertreated in the general population: guidance for clinicians to  
12 prevent coronary heart disease: consensus statement of the European Atherosclerosis  
13 Society. *Eur Heart J* 2013;34(45):3478-90a. doi: 10.1093/eurheartj/eh273
- 14 5. Mabuchi H, Nohara A, Noguchi T, et al. Molecular genetic epidemiology of homozygous  
15 familial hypercholesterolemia in the Hokuriku district of Japan. *Atherosclerosis*  
16 2011;214(2):404-7. doi: 10.1016/j.atherosclerosis.2010.11.005
- 17 6. Versmissen J, Oosterveer DM, Yazdanpanah M, et al. Efficacy of statins in familial  
18 hypercholesterolaemia: a long term cohort study. *BMJ* 2008;337:a2423. doi:  
19 10.1136/bmj.a2423
- 20 7. Teramoto T, Kobayashi M, Tasaki H, et al. Efficacy and Safety of Alirocumab in Japanese  
21 Patients With Heterozygous Familial Hypercholesterolemia or at High Cardiovascular  
22 Risk With Hypercholesterolemia Not Adequately Controlled With Statins-  
23 ODYSSEY JAPAN Randomized Controlled Trial. *Circ J* 2016;80(9):1980-7. doi:  
24 10.1253/circj.CJ-16-0387



- 1  
2  
3 1 8. Tada H, Kawashiri MA, Nohara A, et al. Impact of clinical signs and genetic diagnosis of  
4  
5 2 familial hypercholesterolaemia on the prevalence of coronary artery disease in  
6  
7 3 patients with severe hypercholesterolaemia. *Eur Heart J* 2017 doi:  
8  
9 4 10.1093/eurheartj/ehx004  
10  
11  
12 5 9. Khera AV, Won HH, Peloso GM, et al. Diagnostic Yield and Clinical Utility of  
13  
14 6 Sequencing Familial Hypercholesterolemia Genes in Patients With Severe  
15  
16 7 Hypercholesterolemia. *J Am Coll Cardiol* 2016;67(22):2578-89. doi:  
17  
18 8 10.1016/j.jacc.2016.03.520  
19  
20  
21 9 10. Mabuchi H, Nohara A, Noguchi T, et al. Genotypic and phenotypic features in  
22  
23 10 homozygous familial hypercholesterolemia caused by proprotein convertase  
24  
25 11 subtilisin/kexin type 9 (PCSK9) gain-of-function mutation. *Atherosclerosis*  
26  
27 12 2014;236(1):54-61. doi: 10.1016/j.atherosclerosis.2014.06.005  
28  
29  
30 13 11. Ohta N, Hori M, Takahashi A, et al. Proprotein convertase subtilisin/kexin 9 V4I variant  
31  
32 14 with LDLR mutations modifies the phenotype of familial hypercholesterolemia. *J*  
33  
34 15 *Clin Lipidol* 2016;10(3):547-55 e5. doi: 10.1016/j.jacl.2015.12.024  
35  
36  
37 16 12. Fromer M, Moran JL, Chambert K, et al. Discovery and statistical genotyping of copy-  
38  
39 17 number variation from whole-exome sequencing depth. *Am J Hum Genet*  
40  
41 18 2012;91(4):597-607. doi: 10.1016/j.ajhg.2012.08.005  
42  
43  
44 19 13. Jameson JL, Longo DL. Precision medicine--personalized, problematic, and promising. *N*  
45  
46 20 *Engl J Med* 2015;372(23):2229-34. doi: 10.1056/NEJMs1503104  
47  
48  
49 21 14. Goldberg AC, Hopkins PN, Toth PP, et al. Familial hypercholesterolemia: screening,  
50  
51 22 diagnosis and management of pediatric and adult patients: clinical guidance from the  
52  
53 23 National Lipid Association Expert Panel on Familial Hypercholesterolemia. *J Clin*  
54  
55 24 *Lipidol* 2011;5(3):133-40. doi: 10.1016/j.jacl.2011.03.001  
56  
57  
58  
59  
60

- 1  
2  
3 1 15. Galema-Boers AM, Lenzen MJ, Engelkes SR, et al. Cardiovascular risk in patients with  
4  
5 2 familial hypercholesterolemia using optimal lipid-lowering therapy. *J Clin Lipidol*  
6  
7 3 2018 doi: 10.1016/j.jacl.2017.12.014  
8  
9  
10 4 16. Kullo IJ, Jouni H, Austin EE, et al. Incorporating a Genetic Risk Score Into Coronary  
11  
12 5 Heart Disease Risk Estimates: Effect on Low-Density Lipoprotein Cholesterol Levels  
13  
14 6 (the MI-GENES Clinical Trial). *Circulation* 2016;133(12):1181-8. doi:  
15  
16 7 10.1161/CIRCULATIONAHA.115.020109  
17  
18  
19 8 17. Stone NJ, Robinson JG, Lichtenstein AH, et al. 2013 ACC/AHA guideline on the  
20  
21 9 treatment of blood cholesterol to reduce atherosclerotic cardiovascular risk in adults: a  
22  
23 10 report of the American College of Cardiology/American Heart Association Task  
24  
25 11 Force on Practice Guidelines. *J Am Coll Cardiol* 2014;63(25 Pt B):2889-934. doi:  
26  
27 12 10.1016/j.jacc.2013.11.002  
28  
29  
30 13 18. Friedewald WT, Levy RI, Fredrickson DS. Estimation of the concentration of low-density  
31  
32 14 lipoprotein cholesterol in plasma, without use of the preparative ultracentrifuge. *Clin*  
33  
34 15 *Chem* 1972;18(6):499-502.  
35  
36  
37 16 19. Lewis KL, Umstead KL, Johnston JJ, et al. Outcomes of Counseling after Education  
38  
39 17 about Carrier Results: A Randomized Controlled Trial. *Am J Hum Genet* 2018 doi:  
40  
41 18 10.1016/j.ajhg.2018.02.009  
42  
43  
44  
45  
46  
47  
48  
49  
50  
51  
52  
53  
54  
55  
56  
57  
58  
59  
60

1  
2  
3  
4  
5  
6  
7  
8  
9  
10  
11  
12  
13  
14  
15  
16  
17  
18  
19  
20  
21  
22  
23  
24  
25  
26  
27  
28  
29  
30  
31  
32  
33  
34  
35  
36  
37  
38  
39  
40  
41  
42  
43  
44  
45  
46  
47  
48  
49  
50  
51  
52  
53  
54  
55  
56  
57  
58  
59  
60

1 **FIGURE LEGEND**

2 **Figure 1. Scheme of this study protocol.**

For peer review only

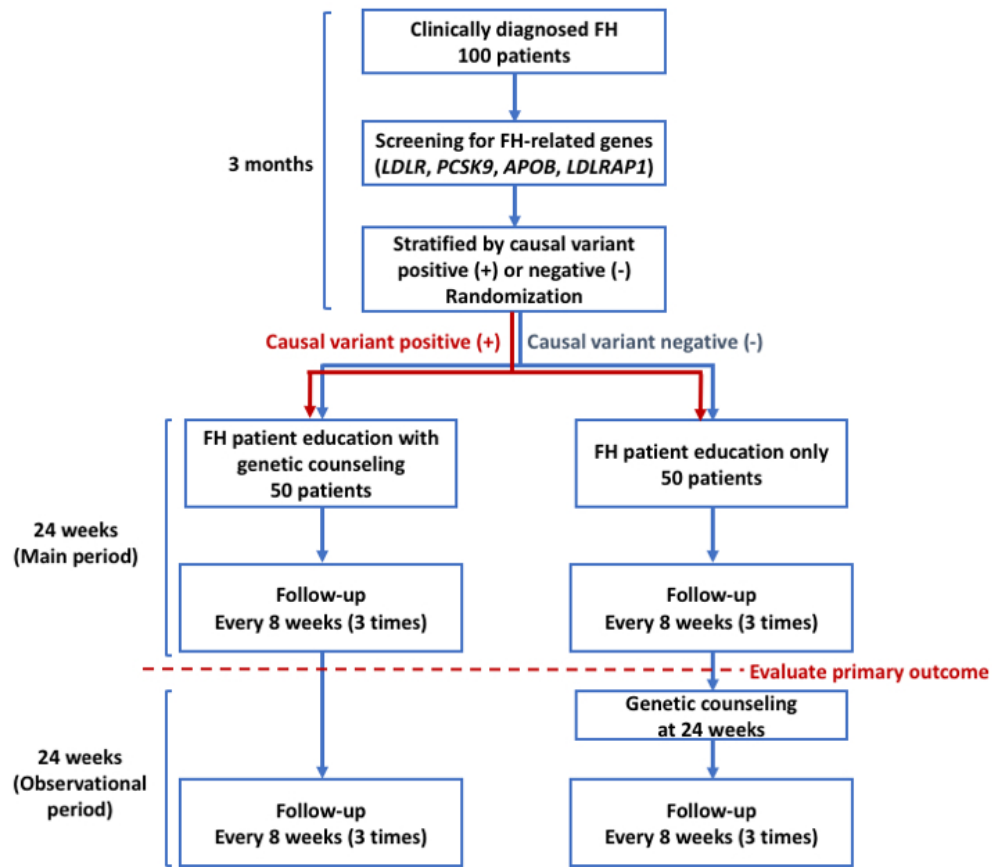

Figure 1

446x396mm (41 x 41 DPI)

# 10 説明文書

## 17 臨床試験のための説明・同意書

18 (家族性高コレステロール血症における遺伝子検査の有用性の検討)  
19  
20  
21  
22  
23  
24

25 今から、あなたにこの臨床研究の内容について説明いたします。この説明文書は、  
26 私たちの説明をおぎない、あなたの理解を深めるためのものですのでよく読まれて、  
27 研究に参加いただけるかどうかご検討ください。  
28  
29  
30

31  
32  
33 なお、この研究に参加されるかどうかはあなたの自由です。研究に参加した後でも、  
34 いつでも自由にやめることができます。もしお断りになっても、あなたのこれからの  
35 治療に差し支えることは全くありません。  
36  
37  
38  
39

40  
41 この研究に参加されるかどうかを決めていただくためには、あなたに研究の内容に  
42 ついてできるだけ多く知っていただくことが必要です。説明の中でわかりにくい言葉  
43 や疑問、質問がありましたらどんなことでも遠慮なくお尋ねください。  
44  
45  
46  
47  
48  
49  
50  
51  
52  
53  
54  
55  
56  
57  
58  
59  
60

1 金沢大学附属病院 第2.0版 (作成日:2018年8月27日)

## 2 3 4 5 1. 臨床試験とは?

6  
7 病院で患者さんが今受けておられる治療は、現時点で最も良いと科学的に評価されている治療法  
8  
9 が中心になっています。

10  
11  
12  
13 それでは、どうしたら、最も優れた治療法がわかるのでしょうか? 新しい治療法(手術法、新  
14  
15 薬など)が、これまでの治療より優れているかどうかはどうしたらわかるのでしょうか?

16  
17  
18 そのことを確かめるために行なうのが、「臨床試験」です。

19  
20  
21  
22 「臨床試験」とは、試験計画にしたがって患者さんが治療を受けられ、医師はその治療法が患者  
23  
24 さんにどのような効果をもたらすかを検討します。また、臨床試験では患者さんの身に及ぶ危険性  
25  
26 も考えられるため、どのような試験についても患者さんを危険性から守るための様々な工夫がされ  
27  
28 ています。

29  
30  
31  
32 この臨床試験は参加された方の安全や人権を守るために、国が定めた基準に従って行われます。  
33  
34 また、当院の臨床試験審査委員会で審査を受け、実施について病院長の許可を得ています。なお、  
35  
36 臨床試験審査委員会の手順書、委員名簿および会議の記録(臨床試験名、審議結果など)の概要に  
37  
38 ついては下記のホームページでご覧になれます。臨床試験に参加いただいている皆様の情報(お名  
39  
40 前、ご住所、生年月日、電話番号など)については、公表いたしません。ホームページをご覧にな  
41  
42 れない方で内容をお知りになりたい方、またホームページをご覧になり、さらに詳しい内容をお知  
43  
44 りになりたい方は、ご遠慮なく「先端医療開発センター」(電話:076-265-2049:平日9時  
45  
46 から17時まで)までお申し出ください。

47  
48  
49  
50  
51 金沢大学附属病院「先端医療開発センター」ホームページ

52  
53 アドレス: <http://icrek.w3.kanazawa-u.ac.jp>

金沢大学附属病院 第2.0版 (作成日:2018年8月27日)

## 2. あなたの病気(症状)について

家族性高コレステロール血症(FH)は、肝臓においてLDLコレステロール(いわゆる悪玉コレステロール)を代謝するLDL受容体ないしはその関連した組織に、遺伝的に機能障害があり、これに伴い血中のコレステロール(主にLDLコレステロール)が著明に上昇する病気です。これにより、狭心症や心筋梗塞などの、冠動脈(心臓を栄養する動脈)が狭窄・閉塞(細くなったり詰まったりする)する可能性が高くなります。この病気に対しては肝臓でのLDL受容体の数や機能を増加・改善しうるHMG-CoA還元酵素阻害薬(スタチン製剤と呼ばれています)により、血中のコレステロール濃度はかなり低下させることができるようになりました。さらに、早期からスタチン製剤を使用することで血中のLDLコレステロール値を改善させ、動脈硬化の進展および冠動脈疾患の発症を予防することが可能であることが示されており、より早期の段階で家族性高コレステロール血症を的確に診断し、早期治療に結びつけることが重要です。

日本において、15歳以上の家族性高コレステロール血症の臨床診断は、高LDLコレステロール血症、腱黄色種の存在、FHの家族歴、の3項目をもとに行われます。確定診断のためには、上記の臨床診断に加えて、主に遺伝子検査が必須です。しかし、遺伝子検査が一部の施設でしか行われていないこと、またその煩雑さと人的・金銭的労力の大きさから、なかなかこの遺伝子検査が浸透しにくい状況でした。さらに、患者さんにとって家族性高コレステロール血症の臨床診断に加えて遺伝子検査を行う診断以上の利点が明らかではなかったのも問題でした。

## 3. 今回の臨床試験について

そこで、今回の臨床試験では、これまで家族性高コレステロール血症に関係する遺伝子解析を受けたことのない家族性高コレステロール患者さんを対象として、従来の患者指導に遺伝子検査の結果説明を含む遺伝カウンセリングと、原因変異保有の有無から導き出される将来の心血管イベント発症リスクの説明を加えることが、家族性高コレステロール患者さんのLDLコレステロール値に影響を与えるかどうかを前向きに検討いたします。遺伝子検査の結果は、遺伝診療の経験が豊富な医師より説明をさせていただき、質問にも答え、十分に理解していただくように努めます。

1 金沢大学附属病院 第2.0版 (作成日:2018年8月27日)

## 2 4. 試験の方法について

### 3 1) 試験期間

4 臨床試験審査委員会承認後 ~2021年3月31日

### 5 2) 試験スケジュール

6 参加予定期間: 臨床試験審査委員会承認後から2019年12月31日まで

7 参加予定人数: 合計100名

#### 8 ※試験の参加基準 (下記を全て満たす患者さんが本研究に参加できます) :

- 9 • 同意取得時において、年齢が15歳以上
- 10 • 性別は問わない
- 11 • 日本におけるFH臨床診断基準に合致する
- 12 • これまでFHに関する遺伝子解析あるいは結果報告を受けていない
- 13 • あなたが本試験参加にあたり十分な説明を受けた、十分な理解の上、あなた(および未成年の
- 14 場合はその代諾者)の自由意志により文書で同意が得られる

#### 15 ※試験の除外基準 (下記のうち一つでも当てはまる場合は本研究に参加できません) :

- 16 • 高度の肝障害を有する (AST、ALTが基準上限の3倍以上)
- 17 • 高度の腎障害を有する ( $Cr > 2.0$  mg/dL)
- 18 • 免疫抑制状態
- 19 • 悪性腫瘍がある
- 20 • 冠動脈疾患の既往を有する (以下のいずれかを満たす)
  - 21 1) 心筋梗塞の既往
  - 22 2) 経皮的冠動脈形成術・ステント留置術・冠動脈バイパス術の既往
  - 23 3) 冠動脈造影検査により75%以上の有意狭窄を指摘された既往
- 24 • 妊娠中あるいは妊娠の可能性のある女性
- 25 • その他、試験責任(分担)医師が被験者として不適当と判断した患者さん



金沢大学附属病院 第2.0版 (作成日: 2018年8月27日)

※試験のアウトライン

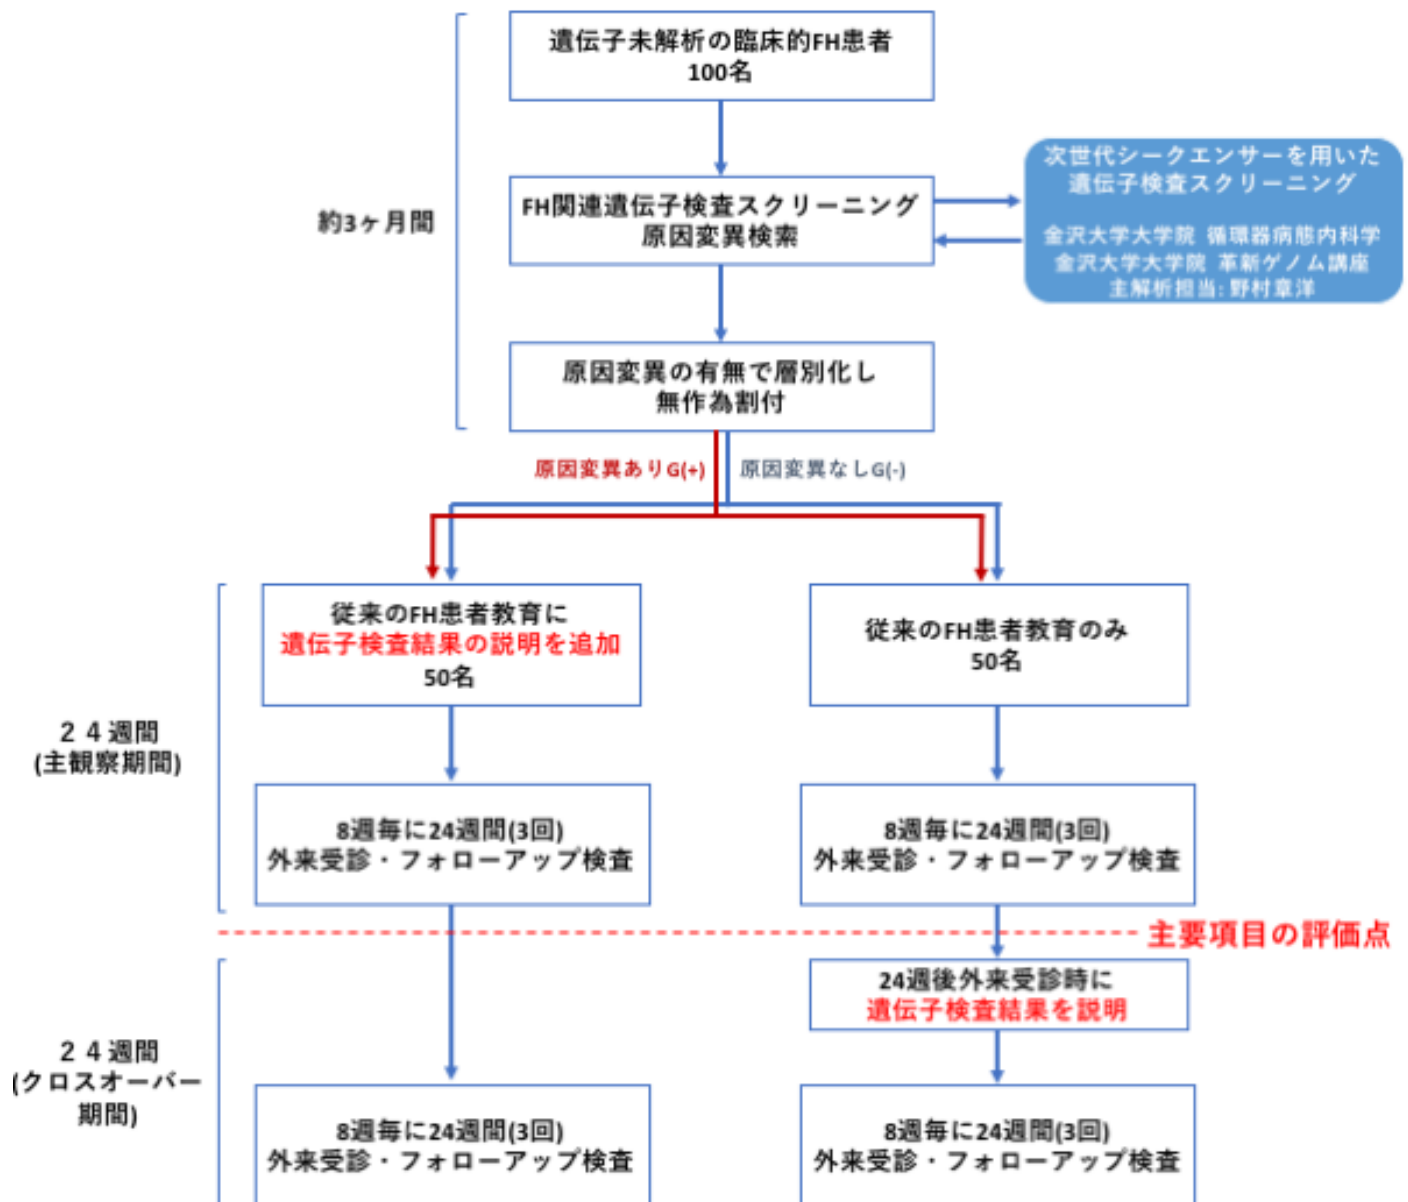

※追加の検査について

FH 関連遺伝子検査スクリーニングを行う際に、遺伝子採血(5ml×2本)を行います。

試験中、採血は原則外来受診時に合計8回行われます。また、外来受診後に、診察室の外であな  
た(被験者ご本人)に患者満足度評価シートへの記入をお願いいたします(合計8回)。

※外来受診について

無作為割付時に、割付された群に応じて30分から1時間程度のカウンセリングがあります。

無作為割付後、8週(±2週間)毎に診察および検査のために外来に来ていただきます。

ただし、外来主治医が医学的に必要と判断された場合は、その他の日程で臨時の受診日が設けら  
れることがあります。



金沢大学附属病院 第2.0版 (作成日:2018年8月27日)

## 5. 予想される効果(効き目)と不利益について

**効果について**…今回の試験参加そのものによるメリットはありません。ただし、検査結果により、FHに関連する遺伝子変異の保有の有無を知ることができます。

**不利益について**…遺伝子採血に伴う合併症（皮下血腫、採血側末梢のしびれなど）がある可能性があります。また、遺伝子検査の結果を知ることにより、一時的に不安を感じる、あるいは抑うつ状態等になる場合があります。ただし、そのようなリスクを避けるために、臨床遺伝専門医の資格を持つ医師、あるいは専門医の指導のもと臨床遺伝専門研修中の医師より十分な遺伝カウンセリングを受けていただきます。また、このような遺伝カウンセリングのほかに、あなたが遺伝子検査等に関して心配なことがありましたら、介入群、対照群にかかわらず個別にカウンセリングを受けることが可能ですので、申し出てください。

この試験に参加されている期間中、新たにあなたの試験継続の意思に影響を与えるような情報を入手した場合には、直ちにお知らせいたします。さらに試験を始めた後に、この試験に関して重要な情報が得られた場合は、試験を続けることに関してもう一度同意をいただくことにしています。

## 6. 健康被害が生じた場合の補償について

この試験は、これまでの研究・試験結果に基づいて科学的に計画され、慎重に行われます。

この臨床試験に伴い合併症が出現する可能性がごくわずかです。ただし、遺伝子採血に伴う手技等の合併症を100%予防することは不可能です。少しでも異常な症状が現れたときはすぐにお知らせ下さい。

今回の試験に伴い合併症が発生した場合には、合併症についての適切な治療を行います。しかしながら、治療に伴う費用はご自身の負担となります。

## 7. 試験参加に伴う費用負担について

この臨床試験で行う遺伝子検査および解析費用は、全て研究責任者が所属する診療科の研究費からお支払いいたします。したがって、この試験に参加することにより通常の診療費用と比べて、負担が増えることはありません。

金沢大学附属病院 第2.0版 (作成日: 2018年8月27日)

## 8. 記録の保存について

当院におけるこの試験に係る記録（試験等の実施に係わる重要な文書（申請書類の控え、病院長からの通知文書、各種申請書、報告書の控、被験者識別コードリスト、同意書、その他データの信頼性を保証するのに必要な書類または記録等）、血液から抽出したDNA、および変異情報等の遺伝子解析データ）は、この試験の終了にについて報告された日又はこの試験の結果の最終の公表について報告された日のいずれか遅い時期から電子データ及び観察・実験ノートは10年を経過した日、その他の文書については5年を経過した日までの期間保存され、その後には個人情報に注意して廃棄されます。

また、診療録については、当院の規定に基づき、保管・廃棄を行います。

## 9. 記録の閲覧について

あなたの希望により、他の患者さんの個人情報保護などに差し障りのない範囲内で、この試験の計画や方法についての資料を見ることができます。研究全体の成果については、ご希望があればお知らせいたします。いずれの場合も担当医師へお申し出ください。なお、この研究は、「人を対象とする医学系研究に関する倫理指針」に従い、大学病院医療情報ネットワーク（UMIN-CTR）で公開されていますので、研究の内容や進捗状況、結果等についてご覧いただくこともできます。

## 10. あなたの人権に対する配慮および個人情報の保護について

本試験は、人を対象とする医学系研究に関する倫理指針（厚生労働省告示、平成26年12月）、およびヘルシンキ宣言、当該施設のCOIマネジメント指針を遵守して実施いたします。

研究実施に必要な資料等を取り扱う際は、あなたの個人情報等は無関係の番号を付して管理し、あなたの秘密保護に十分配慮いたします。またデータベースへの登録の際は、要配慮個人情報を除き匿名化されたものを登録いたします。研究の結果を公表する際は、被験者を特定できる情報を含まないようにいたします。また、今回の研究目的以外に得られたあなたの試料等を使用する場合は、改めて研究計画書を倫理委員会に提出し、然るべき対応を行った上で使用いたします。

なお、解析データを研究室が独自に契約するクラウド環境に保管する場合、アクセス制御と使用者認証により研究室が独自に契約するクラウド環境へのアクセスを管理し、暗号化されたコンピュータ端末から安全な接続を用いてデータをアップロードし、保管いたします。データの保管に関して、原則ゲノムデータと臨床情報を同一のデータ保存区域内には保存いたしません。ただし、ゲノムデータと表現系との関係を明らかにする解析を行う際にやむを得ず臨床情報が必要な場合限り、ゲノムデータと臨床情報を同一データ保存区域内に保存し、解析を行います。解析終了後は可

1 金沢大学附属病院 第2.0版 (作成日:2018年8月27日)

2 及的速やかに臨床情報をゲノムデータ保存区域内から削除いたします。

3  
4 この試験で得られた結果は学会や医学雑誌等に発表されることがあります。このような場合、あ  
5 なたの個人情報などのプライバシーに関するものが公表されることは一切ありません。

6  
7 また、この試験が適正に行われているかどうかを確認するために、臨床試験審査委員会などの関  
8 係者が、あなたの診療に関する記録(他科分や試験参加以前の期間も含みます)を閲覧することが  
9 あります。このような場合でも、これらの関係者には守秘義務が課せられていますので、あなたの  
10 名前などのプライバシーにかかわる情報は守られます。

11  
12  
13  
14  
15  
16  
17  
18  
19  
20  
21  
22  
23  
24  
25  
26  
27  
28  
29  
30  
31  
32  
33  
34  
35  
36  
37  
38  
39  
40  
41  
42  
43  
44  
45  
46  
47  
48  
49  
50  
51  
52  
53  
54  
55  
56  
57  
58  
59  
60

なお、最後のページにあります同意文書に署名(または記名・捺印)されますと、  
この閲覧についてご了解いただいたことになります。

## 1 1. 遺伝子解析の結果の伝え方

今回の臨床試験にご同意頂いた場合、試験スケジュールにありますとおり、どちらの群になり  
ましても最終的にFHに関連する遺伝子変異の検査結果をお伝えいたします。ただし、ご同意後  
にご自身の結果を知りたくなくなることもあるかもしれません。検査結果の説明を最終的に受ける  
かどうかはあなたご自身の自由意思によるものですので、ご同意後でも、検査中止や解析結果を  
知ることについての判断の変更はいつでも行えます。

また、今回の試験において遺伝子変異の検査結果が陽性・陰性いずれかと判断されましても、  
将来の遺伝子分野の研究の発展により判定結果が変わる可能性があります。そのような変更がご  
ざいました場合は、必要に応じて随時ご参加をいただきましたみなさまにご連絡をいたします。

## 1 2. 試験への参加の自由と同意撤回の自由について

この試験に参加するかどうかについては、よく考えていただき、あなた自身の自由な意思でお決  
めください。また、試験に参加することに同意された後、もしくは試験が始まった後でもいつでも  
同意を取り下げることができます。もし、お断りになっても、あなたのこれからの治療に差し支え  
ることは一切ありません。

ただし、試験が開始された後に同意を取り下げた場合には、あなたの健康管理のため、追加検査  
していただく場合があります。また、それまでに得られた結果については、改めて承諾を得た上で  
使用します。

1 金沢大学附属病院 第2.0版 (作成日:2018年8月27日)

### 2 13. 他の検査・治療法について

3  
4 遺伝子検査を行わない場合でも、通常の高コレステロール血症の治療ガイドラインに基づき、  
5 血清脂質値や臨床所見をもとに治療を行います。  
6  
7

### 8 9 10 11 12 14. 試験中止となる場合の条件又は理由

- 13 ① あなたが試験の中止を希望した場合あるいは同意の撤回をした場合
- 14 ② ご同意・登録後に試験に不相当であることが判明した場合
- 15 ③ ご病状の悪化などにより試験が好ましくないと判断された場合
- 16 ④ 試験中の有害事象
- 17 ⑤ 試験全体が中止された場合
- 18 ⑥ 妊娠が判明した場合
- 19 ⑦ 担当医師が試験の継続が不相当であると判断した場合

### 20 21 22 23 24 25 26 27 28 29 30 31 32 15. あなたに守っていただきたいことについて

33 この試験に参加していただける場合は、次のことをお守りください。

- 34 ① 試験に参加している間は、私たちの指示に従い、必ず診察、検査、投薬等を受けてください。  
35 もし、来院予定日に来院できない場合は、必ず私たちに連絡してください。
- 36 ② 他の薬を併用することで、血清脂質値に変化があることがあります。そのため、他の病院から  
37 出された薬がある場合には、試験参加前に必ず私たちに伝えてください。  
38 また、試験中に他の病院で治療を受ける場合や新たに薬を使用される場合も、必ず事前に私  
39 たちに相談してください。

### 40 41 42 43 44 45 46 47 48 49 50 51 52 16. この試験参加に係る謝礼について

53 この試験に参加して頂く事に対する謝礼はございません。  
54  
55  
56  
57  
58  
59  
60

金沢大学附属病院 第2.0版 (作成日:2018年8月27日)

## 17. この試験に係る資金ならびに関連機関との関わりについて

この試験は 診療科の研究費 にて行います。

本研究の研究担当者は「金沢大学臨床研究利益相反マネージメントポリシー」に従い、金沢大学臨床研究利益相反マネージメント委員会に必要事項を申告し、審査と承認を得ています。

この試験において遺伝子検査を行う機械を販売するイルミナ株式会社、および検査試薬を販売するロシュ・ダイアグノスティックス株式会社との間に利害関係はありません。従って、私はこの試験の実施の際に個人的な利益のために専門的な判断を曲げるようなことは一切いたしません。

## 18. 知的財産の帰属について：

この研究から成果が得られ、知的財産権などが生じる可能性があります、その権利は研究グループに帰属します。

## 19. 問い合わせ、苦情等の連絡先：

あなたが、病気のことや今回の遺伝子解析研究に関して、疑問に思うことや困ったことが生じる場合は、下記にご連絡下さい。

試験責任医師；野村 章洋

連絡先：〒920-0934 金沢市宝町13番1号

金沢大学附属病院 先端医療開発センター

電話番号：076-265-2049

ファックス番号：076-265-2090

以上、この臨床試験の内容について十分ご理解いただいたうえで、参加していただける場合は、最終ページの同意文書に同意年月日の記載と署名をしてご提出ください。署名していただきました同意文書は、あなたと病院がそれぞれ保管することになります。

この説明文書と同意文書（患者さん控え）を大切に保管しておいてください。

## 説明・同意書

原本を診療録に保管

保管期限： 診療録と同じ

金沢大学附属病院 第2.0版 (作成日：2018年8月27日)

## 同意文書 (臨床試験：6069)

金沢大学附属病院

診療科：循環器内科・先端医療開発センター

責任医師名：野村 章洋 殿

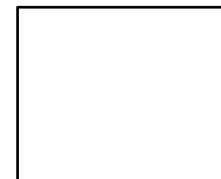

私は、「家族性高コレステロール血症における遺伝子検査の有用性の検討」の臨床試験に参加するにあたり、説明文書を受け取り、内容について説明を受けました。本試験の内容(目的と方法など)を十分に理解しました。また、同意した後であっても、いつでも同意を撤回できること、そのことによって何ら不利益を生じないこと、疑問があればいつでも質問できることについても説明を受け納得しました。つきましては、私自身の自由意志により研究への協力に同意します。

## 1. 本研究に被験者として参加することに同意いたします。

はい いいえ

- |                                |                                |
|--------------------------------|--------------------------------|
| 1. 臨床試験とは                      | 11. 遺伝子解析の結果の伝え方               |
| 2. あなたの病気(症状)について              | 12. 試験への参加の自由と同意撤回の自由について      |
| 3. 今回の臨床試験について                 | 13. 他の検査・治療法について               |
| 4. 試験の方法について                   | 14. 試験中止となる場合の条件又は理由           |
| 5. 予想される効果(効き目)と不利益について        | 15. あなたに守っていただきたいことについて        |
| 6. 健康被害が生じた場合の補償について           | 16. この試験参加に係る謝礼について            |
| 7. 試験参加に伴う費用負担について             | 17. この試験に係る資金ならびに関連機関との関わりについて |
| 8. 記録の保存について                   | 18. 知的財産権の帰属について               |
| 9. 記録の閲覧について                   | 19. 問い合わせ、苦情等の連絡先              |
| 10. あなたの人権に対する配慮および個人情報の保護について |                                |

## 2. 提供する試料等が本臨床研究に使用された後に、長期保存され、将来、新たに計画・実施される遺伝子解析研究を含む医学研究に使用されることに同意いたします。

はい いいえ

同意日：西暦 年 月 日

ご本人 ID 氏名 氏名(署名)

〒 - 現住所

代諾者 氏名(署名)

〒 - 現住所 続柄( )

説明日：西暦 年 月 日

所属

試験責任(分担)医師

※臨床試験の同意書は、病歴室経由で先端医療開発センターへ提出してください。

(外来) 同意書原本→病歴室経由で先端医療開発センターへ提出 同意書コピー(1部)→患者さんへ渡す

(入院) 同意書原本→カルテへ保管

同意書コピー(2部)→1部は患者さんへ渡す、1部は病歴室経由で先端医療開発センターへ提出。



患者説明資料 別紙1 (家族性高コレステロール血症における遺伝子検査の有用性の検討)

# 家族性高コレステロール血症に関する 遺伝子変異と心臓病

- 血清LDLコレステロール値に比例して心臓病(冠動脈疾患)は増加する
- 同じ血清LDLコレステロール値であっても、家族性高コレステロール血症に関する遺伝子変異があると、変異がない方々に比べて心臓病(冠動脈疾患)に約2-3倍なりやすい\*

\*Khera, A.V., Nomura A, et al. *J Am Coll Cardiol*. 2016. Hayato T, et al. *Eur Heart J*. 2016.

患者説明資料 別紙1 (家族性高コレステロール血症における遺伝子検査の有用性の検討)

# 遺伝子変異の有無は、心血管疾患の発症オッズに関係する

遺伝子変異なし & <130mg/dL群を1とした場合の  
 各群の心血管疾患発症オッズ比



血清LDLコレステロール値 (mg/dL)

家族性高コレステロール血症

Khera, A.V., Nomura A, et al. *J Am Coll Cardiol.* 2016. を一部改変

患者説明資料 別紙1 (家族性高コレステロール血症における遺伝子検査の有用性の検討)

# 遺伝子変異の有無は、心血管疾患の発症オッズに関係する (日本人の家族性高コレステロール血症[FH]に限定)

遺伝子変異なし&臨床症状なし群を1とした場合の  
各群の心血管疾患発症オッズ比

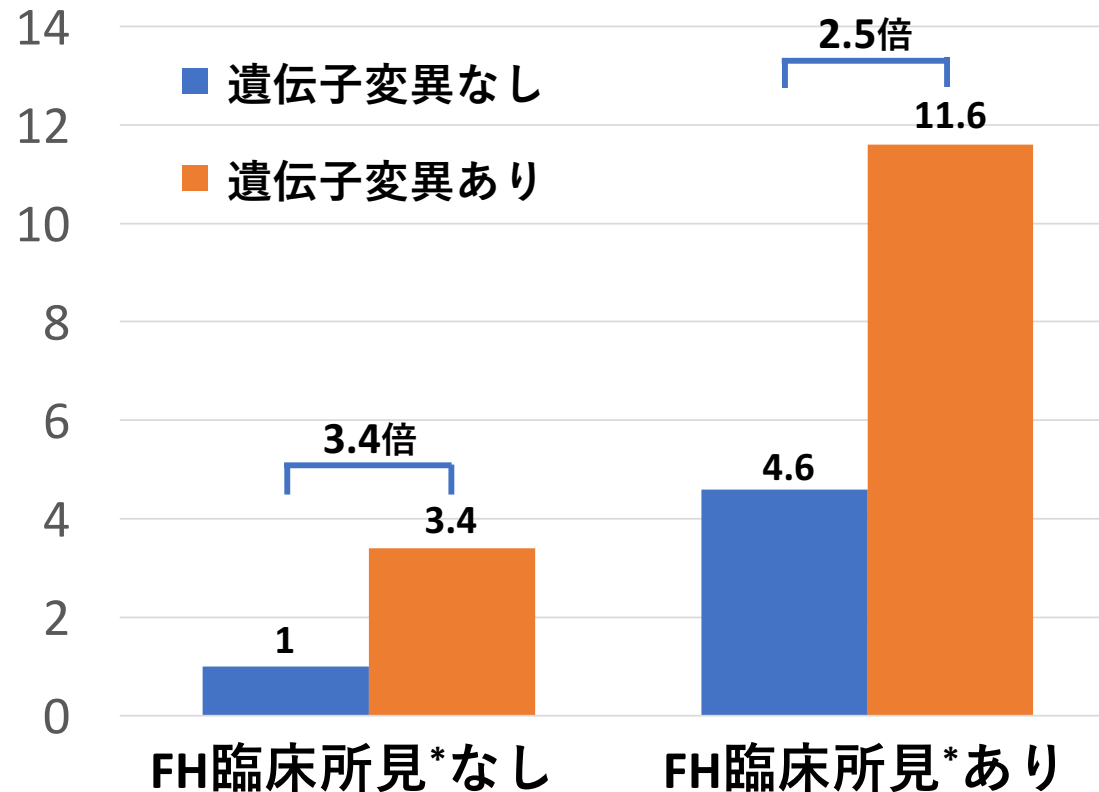

\*FHの家族歴または  
腱黄色腫の存在

Hayato T, et al. *Eur Heart J*. 2016. を一部改変

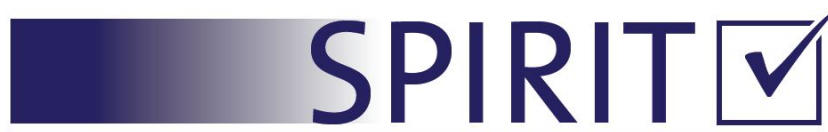

STANDARD PROTOCOL ITEMS: RECOMMENDATIONS FOR INTERVENTIONAL TRIALS

SPIRIT 2013 Checklist: Recommended items to address in a clinical trial protocol and related documents\*

| Section/item                      | Item No        | Description                                                                                                                                                                                                                                                                              |
|-----------------------------------|----------------|------------------------------------------------------------------------------------------------------------------------------------------------------------------------------------------------------------------------------------------------------------------------------------------|
| <b>Administrative information</b> |                |                                                                                                                                                                                                                                                                                          |
| Title                             | 1 (p1)         | Descriptive title identifying the study design, population, interventions, and, if applicable, trial acronym                                                                                                                                                                             |
| Trial registration                | 2a (p3)        | Trial identifier and registry name. If not yet registered, name of intended registry                                                                                                                                                                                                     |
|                                   | 2b (n/a)       | All items from the World Health Organization Trial Registration Data Set                                                                                                                                                                                                                 |
| Protocol version                  | 3 (p7)         | Date and version identifier                                                                                                                                                                                                                                                              |
| Funding                           | 4 (p15)        | Sources and types of financial, material, and other support                                                                                                                                                                                                                              |
| Roles and responsibilities        | 5a (p1, 14-15) | Names, affiliations, and roles of protocol contributors                                                                                                                                                                                                                                  |
|                                   | 5b (n/a)       | Name and contact information for the trial sponsor                                                                                                                                                                                                                                       |
|                                   | 5c (n/a)       | Role of study sponsor and funders, if any, in study design; collection, management, analysis, and interpretation of data; writing of the report; and the decision to submit the report for publication, including whether they will have ultimate authority over any of these activities |
|                                   | 5d (n/a)       | Composition, roles, and responsibilities of the coordinating centre, steering committee, endpoint adjudication committee, data management team, and other individuals or groups overseeing the trial, if applicable (see Item 21a for data monitoring committee)                         |
| <b>Introduction</b>               |                |                                                                                                                                                                                                                                                                                          |
| Background and rationale          | 6a (p4)        | Description of research question and justification for undertaking the trial, including summary of relevant studies (published and unpublished) examining benefits and harms for each intervention                                                                                       |
|                                   | 6b (p10)       | Explanation for choice of comparators                                                                                                                                                                                                                                                    |
| Objectives (p5)                   | 7 (p5)         | Specific objectives or hypotheses                                                                                                                                                                                                                                                        |

|    |                                                           |          |                                                                                                                                                                                                                                                                                                                                                                                |
|----|-----------------------------------------------------------|----------|--------------------------------------------------------------------------------------------------------------------------------------------------------------------------------------------------------------------------------------------------------------------------------------------------------------------------------------------------------------------------------|
| 1  |                                                           |          |                                                                                                                                                                                                                                                                                                                                                                                |
| 2  | Trial design                                              | 8 (p5)   | Description of trial design including type of trial (eg, parallel group, crossover, factorial, single group), allocation ratio, and framework (eg, superiority, equivalence, noninferiority, exploratory)                                                                                                                                                                      |
| 3  |                                                           |          |                                                                                                                                                                                                                                                                                                                                                                                |
| 4  |                                                           |          |                                                                                                                                                                                                                                                                                                                                                                                |
| 5  |                                                           |          |                                                                                                                                                                                                                                                                                                                                                                                |
| 6  |                                                           |          |                                                                                                                                                                                                                                                                                                                                                                                |
| 7  |                                                           |          |                                                                                                                                                                                                                                                                                                                                                                                |
| 8  | <b>Methods: Participants, interventions, and outcomes</b> |          |                                                                                                                                                                                                                                                                                                                                                                                |
| 9  |                                                           |          |                                                                                                                                                                                                                                                                                                                                                                                |
| 10 | Study setting                                             | 9 (p7)   | Description of study settings (eg, community clinic, academic hospital) and list of countries where data will be collected. Reference to where list of study sites can be obtained                                                                                                                                                                                             |
| 11 |                                                           |          |                                                                                                                                                                                                                                                                                                                                                                                |
| 12 |                                                           |          |                                                                                                                                                                                                                                                                                                                                                                                |
| 13 |                                                           |          |                                                                                                                                                                                                                                                                                                                                                                                |
| 14 | Eligibility criteria                                      | 10 (p8)  | Inclusion and exclusion criteria for participants. If applicable, eligibility criteria for study centres and individuals who will perform the interventions (eg, surgeons, psychotherapists)                                                                                                                                                                                   |
| 15 |                                                           |          |                                                                                                                                                                                                                                                                                                                                                                                |
| 16 |                                                           |          |                                                                                                                                                                                                                                                                                                                                                                                |
| 17 |                                                           |          |                                                                                                                                                                                                                                                                                                                                                                                |
| 18 |                                                           |          |                                                                                                                                                                                                                                                                                                                                                                                |
| 19 | Interventions                                             | 11a (p9) | Interventions for each group with sufficient detail to allow replication, including how and when they will be administered                                                                                                                                                                                                                                                     |
| 20 |                                                           |          |                                                                                                                                                                                                                                                                                                                                                                                |
| 21 |                                                           |          |                                                                                                                                                                                                                                                                                                                                                                                |
| 22 |                                                           | 11b      | Criteria for discontinuing or modifying allocated interventions for a given trial participant (eg, drug dose change in response to harms, participant request, or improving/worsening disease)                                                                                                                                                                                 |
| 23 |                                                           | (p10)    |                                                                                                                                                                                                                                                                                                                                                                                |
| 24 |                                                           |          |                                                                                                                                                                                                                                                                                                                                                                                |
| 25 |                                                           |          |                                                                                                                                                                                                                                                                                                                                                                                |
| 26 |                                                           | 11c (p9- | Strategies to improve adherence to intervention protocols, and any procedures for monitoring adherence (eg, drug tablet return, laboratory tests)                                                                                                                                                                                                                              |
| 27 |                                                           | 11)      |                                                                                                                                                                                                                                                                                                                                                                                |
| 28 |                                                           |          |                                                                                                                                                                                                                                                                                                                                                                                |
| 29 |                                                           |          |                                                                                                                                                                                                                                                                                                                                                                                |
| 30 |                                                           |          |                                                                                                                                                                                                                                                                                                                                                                                |
| 31 |                                                           | 11d (p9- | Relevant concomitant care and interventions that are permitted or prohibited during the trial                                                                                                                                                                                                                                                                                  |
| 32 |                                                           | 10)      |                                                                                                                                                                                                                                                                                                                                                                                |
| 33 |                                                           |          |                                                                                                                                                                                                                                                                                                                                                                                |
| 34 | Outcomes                                                  | 12 (p10) | Primary, secondary, and other outcomes, including the specific measurement variable (eg, systolic blood pressure), analysis metric (eg, change from baseline, final value, time to event), method of aggregation (eg, median, proportion), and time point for each outcome. Explanation of the clinical relevance of chosen efficacy and harm outcomes is strongly recommended |
| 35 |                                                           |          |                                                                                                                                                                                                                                                                                                                                                                                |
| 36 |                                                           |          |                                                                                                                                                                                                                                                                                                                                                                                |
| 37 |                                                           |          |                                                                                                                                                                                                                                                                                                                                                                                |
| 38 |                                                           |          |                                                                                                                                                                                                                                                                                                                                                                                |
| 39 |                                                           |          |                                                                                                                                                                                                                                                                                                                                                                                |
| 40 |                                                           |          |                                                                                                                                                                                                                                                                                                                                                                                |
| 41 |                                                           |          |                                                                                                                                                                                                                                                                                                                                                                                |
| 42 | Participant timeline                                      | 13 (p6)  | Time schedule of enrolment, interventions (including any run-ins and washouts), assessments, and visits for participants. A schematic diagram is highly recommended (see Figure)                                                                                                                                                                                               |
| 43 |                                                           |          |                                                                                                                                                                                                                                                                                                                                                                                |
| 44 |                                                           |          |                                                                                                                                                                                                                                                                                                                                                                                |
| 45 |                                                           |          |                                                                                                                                                                                                                                                                                                                                                                                |
| 46 |                                                           |          |                                                                                                                                                                                                                                                                                                                                                                                |
| 47 | Sample size                                               | 14 (p11) | Estimated number of participants needed to achieve study objectives and how it was determined, including clinical and statistical assumptions supporting any sample size calculations                                                                                                                                                                                          |
| 48 |                                                           |          |                                                                                                                                                                                                                                                                                                                                                                                |
| 49 |                                                           |          |                                                                                                                                                                                                                                                                                                                                                                                |
| 50 |                                                           |          |                                                                                                                                                                                                                                                                                                                                                                                |
| 51 | Recruitment                                               | 15 (p11) | Strategies for achieving adequate participant enrolment to reach target sample size                                                                                                                                                                                                                                                                                            |
| 52 |                                                           |          |                                                                                                                                                                                                                                                                                                                                                                                |
| 53 |                                                           |          |                                                                                                                                                                                                                                                                                                                                                                                |

**Methods: Assignment of interventions (for controlled trials)**

## Allocation:

|                                  |              |                                                                                                                                                                                                                                                                                                                                                          |
|----------------------------------|--------------|----------------------------------------------------------------------------------------------------------------------------------------------------------------------------------------------------------------------------------------------------------------------------------------------------------------------------------------------------------|
| Sequence generation              | 16a (p11-12) | Method of generating the allocation sequence (eg, computer-generated random numbers), and list of any factors for stratification. To reduce predictability of a random sequence, details of any planned restriction (eg, blocking) should be provided in a separate document that is unavailable to those who enrol participants or assign interventions |
| Allocation concealment mechanism | 16b (p11-12) | Mechanism of implementing the allocation sequence (eg, central telephone; sequentially numbered, opaque, sealed envelopes), describing any steps to conceal the sequence until interventions are assigned                                                                                                                                                |
| Implementation                   | 16c (p11-12) | Who will generate the allocation sequence, who will enrol participants, and who will assign participants to interventions                                                                                                                                                                                                                                |
| Blinding (masking)               | 17a (p11)    | Who will be blinded after assignment to interventions (eg, trial participants, care providers, outcome assessors, data analysts), and how                                                                                                                                                                                                                |
|                                  | 17b (p11)    | If blinded, circumstances under which unblinding is permissible, and procedure for revealing a participant's allocated intervention during the trial                                                                                                                                                                                                     |

**Methods: Data collection, management, and analysis**

|                         |              |                                                                                                                                                                                                                                                                                                                                                                                                              |
|-------------------------|--------------|--------------------------------------------------------------------------------------------------------------------------------------------------------------------------------------------------------------------------------------------------------------------------------------------------------------------------------------------------------------------------------------------------------------|
| Data collection methods | 18a (p10-11) | Plans for assessment and collection of outcome, baseline, and other trial data, including any related processes to promote data quality (eg, duplicate measurements, training of assessors) and a description of study instruments (eg, questionnaires, laboratory tests) along with their reliability and validity, if known. Reference to where data collection forms can be found, if not in the protocol |
|                         | 18b (n/a)    | Plans to promote participant retention and complete follow-up, including list of any outcome data to be collected for participants who discontinue or deviate from intervention protocols                                                                                                                                                                                                                    |
| Data management         | 19 (p10-11)  | Plans for data entry, coding, security, and storage, including any related processes to promote data quality (eg, double data entry; range checks for data values). Reference to where details of data management procedures can be found, if not in the protocol                                                                                                                                            |
| Statistical methods     | 20a (p11-12) | Statistical methods for analysing primary and secondary outcomes. Reference to where other details of the statistical analysis plan can be found, if not in the protocol                                                                                                                                                                                                                                     |

- 1  
2 20b Methods for any additional analyses (eg, subgroup and adjusted  
3 (p11-12) analyses)  
4  
5 20c Definition of analysis population relating to protocol non-adherence  
6 (p11-12) (eg, as randomised analysis), and any statistical methods to handle  
7 missing data (eg, multiple imputation)  
8

9  
10 **Methods: Monitoring**

- 11 Data monitoring 21a Composition of data monitoring committee (DMC); summary of its  
12 (p11) role and reporting structure; statement of whether it is independent  
13 from the sponsor and competing interests; and reference to where  
14 further details about its charter can be found, if not in the protocol.  
15 Alternatively, an explanation of why a DMC is not needed  
16  
17  
18 21b (n/a) Description of any interim analyses and stopping guidelines,  
19 including who will have access to these interim results and make the  
20 final decision to terminate the trial  
21  
22  
23 Harms 22 (p11) Plans for collecting, assessing, reporting, and managing solicited and  
24 spontaneously reported adverse events and other unintended effects  
25 of trial interventions or trial conduct  
26  
27 Auditing 23 (n/a) Frequency and procedures for auditing trial conduct, if any, and  
28 whether the process will be independent from investigators and the  
29 sponsor  
30

31  
32 **Ethics and dissemination**

- 33  
34 Research ethics 24 (p7) Plans for seeking research ethics committee/institutional review  
35 approval board (REC/IRB) approval  
36  
37 Protocol 25 (p7) Plans for communicating important protocol modifications (eg,  
38 amendments changes to eligibility criteria, outcomes, analyses) to relevant parties  
39 (eg, investigators, REC/IRBs, trial participants, trial registries,  
40 journals, regulators)  
41  
42  
43 Consent or assent 26a (p7) Who will obtain informed consent or assent from potential trial  
44 participants or authorised surrogates, and how (see Item 32)  
45  
46 26b (p7) Additional consent provisions for collection and use of participant  
47 data and biological specimens in ancillary studies, if applicable  
48  
49 Confidentiality 27 (p7) How personal information about potential and enrolled participants  
50 will be collected, shared, and maintained in order to protect  
51 confidentiality before, during, and after the trial  
52  
53  
54 Declaration of 28 (p14) Financial and other competing interests for principal investigators for  
55 interests the overall trial and each study site  
56  
57  
58  
59  
60

|    |                     |           |                                                                        |
|----|---------------------|-----------|------------------------------------------------------------------------|
| 1  |                     |           |                                                                        |
| 2  | Access to data      | 29 (p12)  | Statement of who will have access to the final trial dataset, and      |
| 3  |                     |           | disclosure of contractual agreements that limit such access for        |
| 4  |                     |           | investigators                                                          |
| 5  |                     |           |                                                                        |
| 6  | Ancillary and post- | 30 (p10)  | Provisions, if any, for ancillary and post-trial care, and for         |
| 7  | trial care          |           | compensation to those who suffer harm from trial participation         |
| 8  |                     |           |                                                                        |
| 9  | Dissemination       | 31a       | Plans for investigators and sponsor to communicate trial results to    |
| 10 | policy              | (p12)     | participants, healthcare professionals, the public, and other relevant |
| 11 |                     |           | groups (eg, via publication, reporting in results databases, or other  |
| 12 |                     |           | data sharing arrangements), including any publication restrictions     |
| 13 |                     |           |                                                                        |
| 14 |                     |           |                                                                        |
| 15 |                     | 31b       | Authorship eligibility guidelines and any intended use of professional |
| 16 |                     | (p14-15)  | writers                                                                |
| 17 |                     |           |                                                                        |
| 18 |                     | 31c (n/a) | Plans, if any, for granting public access to the full protocol,        |
| 19 |                     |           | participant-level dataset, and statistical code                        |
| 20 |                     |           |                                                                        |
| 21 |                     |           |                                                                        |
| 22 | <b>Appendices</b>   |           |                                                                        |
| 23 |                     |           |                                                                        |
| 24 | Informed consent    | 32 (p7)   | Model consent form and other related documentation given to            |
| 25 | materials           |           | participants and authorised surrogates                                 |
| 26 |                     |           |                                                                        |
| 27 | Biological          | 33 (p9)   | Plans for collection, laboratory evaluation, and storage of biological |
| 28 | specimens           |           | specimens for genetic or molecular analysis in the current trial and   |
| 29 |                     |           | for future use in ancillary studies, if applicable                     |
| 30 |                     |           |                                                                        |

---

31 \*It is strongly recommended that this checklist be read in conjunction with the SPIRIT 2013  
 32 Explanation & Elaboration for important clarification on the items. Amendments to the protocol  
 33 should be tracked and dated. The SPIRIT checklist is copyrighted by the SPIRIT Group under  
 34 the Creative Commons "[Attribution-NonCommercial-NoDerivs 3.0 Unported](https://creativecommons.org/licenses/by-nc-nd/3.0/)" license.  
 35  
 36  
 37  
 38  
 39  
 40  
 41  
 42  
 43  
 44  
 45  
 46  
 47  
 48  
 49  
 50  
 51  
 52  
 53  
 54  
 55  
 56  
 57  
 58  
 59  
 60
